# Transcriptome Response of Cannabis (*Cannabis sativa* L.) to the Pathogenic fungus *Golovinomyces ambrosiae*

Dinesh Adhikary <sup>1,\*</sup>, Aliaa El-Mezawy <sup>2</sup>, Upama Khatri-Chhetri <sup>1</sup>, Limin Wu <sup>2</sup>, Stephen W. Smith <sup>3</sup>, Jian Zhang <sup>4,5\*</sup>, Jan J. Slaski <sup>2</sup>, Nat N.V. Kav <sup>1</sup> and Michael K. Deyholos <sup>5,\*</sup>

<sup>1</sup> Department of Agricultural, Food & Nutritional Science, University of Alberta, Edmonton, AB Canada

<sup>2</sup> Bio Industrial Division, InnoTech Alberta, Vegreville, AB Canada

<sup>3</sup> Ten-10 Ventures Inc, Kelowna, BC Canada

<sup>4</sup> College of Agriculture, Jilin Agricultural University, Changchun, China

<sup>5</sup> Department of Biology, University of British Columbia, Kelowna BC Canada

\* Correspondence:

Michael K. Deyholos ([michael.deyholos@ubc.ca](mailto:michael.deyholos@ubc.ca));

Dinesh Adhikary ([dadhika1@ualberta.ca](mailto:dadhika1@ualberta.ca));

Jian Zhang ([zhangjian@jlau.edu.cn](mailto:zhangjian@jlau.edu.cn))

**Abstract:** Powdery mildew (PM), caused by the obligate biotrophic fungus *Golovinomyces ambrosiae*, is an economically important fungal disease of hemp - and marijuana-type cannabis.

While the PM disease can be managed effectively by cultivating resistant hosts, there is no known PM-resistant genetic variant. This is the first report of transcript level responses of the hemp cultivar 'X59' to *G. ambrosiae*. Transcript level changes at 5-, 8-, and 11-days post-inoculation (DPI) of *C. sativa* were evaluated against uninoculated control. Our analysis revealed that 1,898 genes were significantly ( $q$ -value < 0.05) differentially expressed (DE) following the pathogen challenge. Among these, 910 and 988 genes were upregulated and downregulated, respectively as the infection progressed to 11 DPI. Genes related to salicylic

acid (SA), (LOC115715124 and LOC115711424) and WRKY transcription factor (LOC115707546, 24  
LOC115715968, and LOC115707511) were highly upregulated. There were 45 DEGs that were 25  
homologous to PM-related genes, including chitin elicitor receptor kinase 1 (*CERK 1*), enhanced 26  
disease resistance 2, (*EDR2*), and powdery mildew resistance (*PMR*) genes. Moreover, the genes 27  
related to glycosyl hydrolases, particularly LOC115699396, LOC115708023, LOC115710105, and 28  
LOC115710100, were highly upregulated and potentially important in mediating pathogen 29  
responses. Collectively, this study has contributed to an enhanced understanding of the 30  
molecular mechanisms that are involved in cannabis and PM disease interaction and has 31  
identified several gene candidates that can be further investigated for their role in defence 32  
mechanisms. 33

**Keywords:** *Cannabis sativa*; Powdery Mildew; *Golovinomyces ambrosiae*; Transcriptome; Biotic- 34  
stress 35

## 1. Introduction 36

Hemp (*Cannabis sativa* cv. 'X59') powdery mildew (PM) is caused by an obligate biotrophic 37  
fungal pathogen, *Golovinomyces ambrosiae*, affecting most of the cannabis cultivars [1]. Initially, 38  
infection appears as white mycelial growth followed by sporulation of pathogens visible as epi- 39  
phytic circular patches with a white fuzzy patina on adaxial leaf surfaces [1], [2]. As the disease 40  
progresses, fungal mycelia and conidia spread to all aerial vegetative and reproductive parts, 41  
including flower bracts, buds, and stems. Apart from degrading the quality of harvested flow- 42  
ers and leaves, PM infection leads to leaf chlorosis, inhibits photosynthetic CO<sub>2</sub> assimilation, 43

reduces the capacity of infected plants to form sucrose, triggers distortion and premature leaf senescence, and eventually diminishes seedling vigour [3]–[6]

Female plants that are primarily destined for medical marijuana can be affected significantly by degraded crop quality because the value is determined by organoleptic factors such as smell and appearance of the product [7]. Leaves with PM infection show fungal mycelial growth with plenty of sporulation and spores are chiefly clustered on the sticky surface of glandular trichomes [1]. Over the course of infection, necrotic lesions are visible on the infection sites. Thus, not only is the product visually repelling but there may also be unknown health risks. While PM disease is caused by a spectrum of fungal strains, *G. ambrosiae* has been the causal agent in *Cannabis* spp. and has the highest incidence in growth facilities across different parts of Canada [8]. This has prompted the prolonged and excessive use of chemical fungicides, which again is not favorable because of residual toxicity and the tendency of enhancing selection pressure on the PM population, which can promote resistance to the fungicides [9]. Thus, the fungus *G. ambrosiae* presents a significant threat to the cannabis industry.

With the advancement of next-generation sequencing technologies, cannabis genome and transcriptome work has progressed. Although genome assemblies are available for several strains of cannabis, complete indexing of abiotic and biotic stress-responsive genes is still far from completion [8]–[10]. Transcriptome assemblies have also been generated for vegetative and reproductive tissues, focusing mostly on active metabolites such as terpenes and cannabinoids [8], [11]–[15]. Recently, Gao et al [16] and Liu et al [17] investigated the transcriptome response to drought and salinity stress, respectively, in hemp-type cultivars. McKernan et al [18] developed some preliminary information on RNA expression in response to biotic stress.

However, there is still a dearth of original research generating transcriptomic information on 66  
the PM-cannabis interaction on the species. Bearing in mind the multifaceted biotrophic nature 67  
of the PM disease, and based on the available cannabis draft genome [12], we hypothesized that 68  
the quantification of transcriptional changes, at 5-, 8-, and 11 - DPI, lead to the identification of 69  
key genes and metabolic pathways that are involved in the cannabis and *G. ambrosiae* interac- 70  
tion, especially in the later stages of infection. In this study, hemp (low THC cannabis) cultivar, 71  
'X59' (susceptible to PM), was infected with *G. ambrosiae* and the transcriptional changes at 72  
three different time points, 5-, 8-, and 11- days post-inoculation was assessed in the inoculated 73  
and control samples at each time point. The genes identified may aid in enhancing our under- 74  
standing of the potential mechanisms of cannabis and PM disease interaction and in the selec- 75  
tion of biomarkers for further validation and investigation of their biological role in mediating 76  
defence response against the disease. 77

## 2. Materials and method 78

### 2.1 Plant Material 79

Seven hemp accessions (Canda, CFX2, Delores, Finola, Katani, Silesia, and X59) were ob- 80  
tained from the InnoTech Alberta, Vegreville germplasm collection and a preliminary disease 81  
screening was carried out. Surface sterilized seeds were sown in sterile potting mix and placed 82  
in controlled growth chamber (Conviron E15) conditions (light intensity  $466 \mu\text{Molm}^{-2}\text{s}^{-1}$ ; photo- 83  
period 16:8 h; temperature  $22 \text{ }^{\circ}\text{C}$ ; and humidity 72%). Light intensity and height were adjusted 84  
as the seedling height increased. When plants were 14 days old post-germination, a pure isolate 85  
of *G. ambrosiae* was inoculated on healthy leaves. All of the inoculated seedlings developed PM 86  
infection and the symptoms were visible by 8 DPI. 87

## 2.2 Preparation of Fungal Pathogen and Inoculation

An isolate of *G. ambrosiae* was kindly provided by Dr. Zamir Punja (Simon Fraser University, British Columbia). The obligate biotrophic fungal isolate was cultured using 25 days old hemp seedlings under controlled growth chamber conditions as indicated above. Fungal culture was initiated 14 days prior to the inoculation of experimental plants. At least 20 young seedlings were infected with PM to culture enough fungal inoculum. By the end of day 14, fungal spores were easily visible and copiously present on the surface of culture leaves confirming the viability and virulence of the isolate. When the experimental hemp seedlings were at the 5-6 leaf stage (7 days post-germination), young leaves including developing middle leaves were lightly moistened using mist from a spray bottle. Using a soft brush, conidia were collected from infected hemp plants and dusted gently over the leaf surface of the healthy leaf. Dusting was performed close to the leaf surface ensuring that each treated plant received an equal amount of fungal inoculum. Inoculated young seedlings were covered with a plastic dome for 24 hours to maintain high humidity on the leaf surface.

## 2.3 Confirmation of Fungal Infection Using Microscopy

To confirm the fungal penetration and infection of plant tissues, asymptomatic and symptomatic leaves from 8- and 11- DPI were collected and immersed in chemical fixative, FAA (3.7% Formaldehyde, 5% Acetic Acid, and 50% Alcohol). Tissue samples were fixed for 72 hours at 4 °C. Tissues were then transferred to ethanol series (50% and 70%) for drying and were embedded in paraffin blocks. Thin cross-sections of the leaves were cut using a microtome (RM2125, Leica, Wetzlar). Cross-sectioned samples were stained with toluidine blue, and then washed and mounted on a glass slide with coverslip using resinous medium. Sections were then

visualized under a light microscope [Leica DMRXA microscope (Meyer Instruments, Texas)], 110  
and images were taken with QI Click digital camera and processed using Q Capture Pro 7 soft- 111  
ware (Q Imaging, British Columbia). 112

#### 2.4 RNA Isolation 113

Plant tissue samples were collected and prepared following the MIQE guidelines [19]. After 114  
fungal inoculation, seedlings were inspected every 24 hours. Ensuring that the sampled leaves 115  
were of the same ages and similar developmental stages, newly opened leaves from both con- 116  
trol and inoculated groups were collected from the two independent experiments at three dif- 117  
ferent time points, 5-, 8-, and 11-DPI and flash-frozen in liquid nitrogen and kept at -80 °C until 118  
RNA extraction. Six plants were collected from experiment 1 (referred as replicate '1' for each 119  
time point) and six additional plants were collected from experiment 2 (referred as replicate '2'  
for each experiment) (Table 1). Frozen samples were homogenized using Geno/Grinder 2010 120  
(ATS Scientific Inc. Burlington, Ontario) and RNA was isolated using RNeasy Plant Mini Kit 121  
(Qiagen, Valencia, California). To remove trace DNA, RNA samples were treated with DNase I 122  
(Ambion, ThermoFisher Scientific, Markham, Ontario) following the manufacturer's protocol. 123  
A total of 12 samples were prepared for RNA sequencing. 124  
125  
126

#### 2.5 RNA Sequencing and Sequence Analysis 127

Total RNA (5-18 µg) was sent to Beijing Genome Institute (BGI Inc., Shenzhen, China) for 128  
library preparation and transcriptome sequencing. Poly(A) mRNA was isolated using oligo(dT) 129  
beads, and mRNA was fragmented into short fragments of 200 bp, which were used to 130

synthesize the first-strand cDNA. Using a buffer mix containing dNTPs, DNA polymerase I, and RNaseH, second-strand cDNA was synthesized and purified using a QiaQuick PCR kit (Qiagen Inc., Duesseldorf, Germany). The short fragments were ligated to sequencing adapters and purified through agarose gel electrophoresis. Finally, suitable cDNA fragments from different tissue libraries were PCR amplified and sequenced using 90 bp PE Illumina HiSeq 2000 (Illumina Inc., San Diego CA, USA). Raw sequence reads were filtered to remove low quality reads and adaptor contamination and deposited in the NCBI sequence read archive (SRA) under project number PRJNA634569.

Paired end reads from all 12 libraries (Table 1) were analyzed using Tuxedo Pipeline [20]. Bowtie2 [21] was used to prepare the reference genome index and TopHat (v2.1.0) [22] to align the raw reads to the reference [12]. Mapped reads were used as the input data for reference guided transcriptome assembly and quantified differential expression using Cufflinks (v2.2.1) [20]. The GTF files generated from all 12 libraries were merged using cuffmerge. Cuffdiff was performed to assess the differentially expressed genes between the control and the treated samples at all three time points. Gene expression was assessed using Fragment Per Kilobase of transcript Per Million fragments mapped (FPKM) values and the significant differential expression for multiple comparison was assessed using Benjamini-Hochberg correction ( $q < 0.05$ ) [23].

To validate the differential gene expression of the transcriptome data, nine putative disease resistance related genes showing a continuous pattern of either upregulation or downregulation at all three-time points were selected for qRT-PCR. Two technical replicates were used, cannabis *actin* (*CsActin*) gene that was published earlier [24] was used as the internal control to normalize the gene expression.

## 2.6 Functional Classification and Annotation of Differentially Expressed Genes (DEG)

Predicted genes were annotated using the Basic Local Algorithm Search Tool (BLASTx) to align genes to the TAIR9 protein database; two databases from Uniprot (TrEMBL and Swissprot); and National Center for Biotechnology Information (NCBI) non-redundant (nr) protein databases [25] NCBI; The UniProt Consortium, 2021]. BLAST hit results with significant homology ( $e$ -value,  $e < 10^{-10}$ , plength  $> 150$  bp, plength  $> 30\%$ ) were further employed for additional inferences of their biological role. TAIR9 hit IDs that correspond to the gene with significant differentially expressed values ( $q$ -value  $< 0.05$ , after Benjamini-Hochberg correction) were taken for gene ontology (GO) enrichment analysis using AgriGo [26]. *Arabidopsis* gene model (TAIR9) was used on the background and the following parameters were applied to run the analysis – statistical test method (Hypergeometric), multi-test adjustment statistical method [Yekutieli (FDR under dependency)], significance level (0.05), minimum number of mapping entries (5), and gene ontology type (complete GO).

## 3. Results and discussion

### 3.1 Differential Response of Hemp Cultivars to *G. ambrosiae* Infection

As a preliminary study, seven different hemp cultivars (Canda, CFX2, Delores, Finola, Katani, Silesia, and X59) were selected in consultation with a hemp grower (Dr. Jan Slaski, InnoTech Alberta, personal communication). All seven cultivars including 'X59' were challenged with *G. ambrosiae* and screened for their susceptibility to the fungus. Three parameters were carefully applied for the assessment: i) time of emergence of symptoms post-inoculation, ii) the number of leaves infected at 11 DPI, and iii) visible chlorotic lesions on the leaf surface. In the preliminary study, all tested cultivars showed fungal symptoms by 8 DPI, the number of



infected leaves was variable between 2-4 in all cultivars, and the symptomatic leaves gradually 175  
turned chlorotic after 12 DPI (Table S1). Thus, based on the extent of infection, all tested 176  
accessions were similar in terms of disease susceptibility to the pathogen indicating that any of 177  
the accessions would be suitable for the downstream molecular analysis. Among all others, X59 178  
was selected as a candidate because X59 is a commercially used Canadian dual-purpose (grain- 179  
fibre type) cultivar accounting for approximately 26% of national acres in 2019 (Government of 180  
Canada). The variety was developed in early 2000 by crossing a male line (in 29) from Voronezh 181  
region and female line (in 50) from Udmurt Republic of the Russian Federation (Government of 182  
Canada). 183

### 3.2 PM Fungal Infection in *C. sativa* cv. 'X59' 184

Information on the life cycle of *G. ambrosiae* is limited. Under favourable conditions, fungal 185  
conidia are produced asexually, and it takes 8-10 h for the germination [2]. Upon germination, 186  
hyphae penetrate the plant cell within 10-17 h. The whole infection process occurs within 120 h 187  
from the time a spore lands on the surface of a leaf to the point of establishment on the tissues, 188  
however, the visible infection was not observed at 5 DPI on the tested genotype (Figure 1 A1 189  
and A2), thus the first time point was selected at 5 DPI. In this study, *G. ambrosiae* infection 190  
showed a characteristic epiphytic growth of circular patches with white fuzzy patina by 8 DPI 191  
and progressed rapidly to 11 DPI, the growth was predominantly on the adaxial surface (Figure 192  
1 B1, B2, and C1, C2). Once the epiphytic growth was visible, the radius of the infection in- 193  
creased, and the onset of chlorosis on the leaf surface was observed; this symptom was likely 194  
associated with the degeneration of palisade parenchymal cells (Figure 2 A1, A2, A3, B1, and 195  
B2). As the infection progressed, infected spots were visible on the abaxial surface with an 196

abundant colony of hyphal structures on the surface. At the microscopic level, appressorium and haustorium were visible, along with a network of hyphal structures and hyphal bridges between the cells (Figure 2 A1 and A3). Initiation of chlorosis of the leaf may have resulted due to collapsing of mesophyll palisade and spongy cells forming lumen or swollen like structures between the cells [Figure 2 A1, A3, and B1; [27], [28]]. An earlier report suggested that during PM disease development, accumulation of H<sub>2</sub>O<sub>2</sub> first occurred in mesophyll cells that are underlying just below the infected epidermal cells and gradually H<sub>2</sub>O<sub>2</sub> accumulated around the infected cells [28], thereby the damage to the cells might have been caused by H<sub>2</sub>O<sub>2</sub> accumulation [29]. By 11 DPI, an early sign of chlorotic lesions was evident on the upper leaf surfaces and chlorosis on the lower surface took another 24-48 hours. Thus, the three-time points (5-, 8-, and 11-DPI) were selected to capture the transcriptomics changes (5 DPI: early stage with no visible symptoms on the leaf surface; 8 DPI: onset of visible infection on the leaf surface, and 11 DPI: full-fledged infection with visible circular patches and early onset of chlorosis).

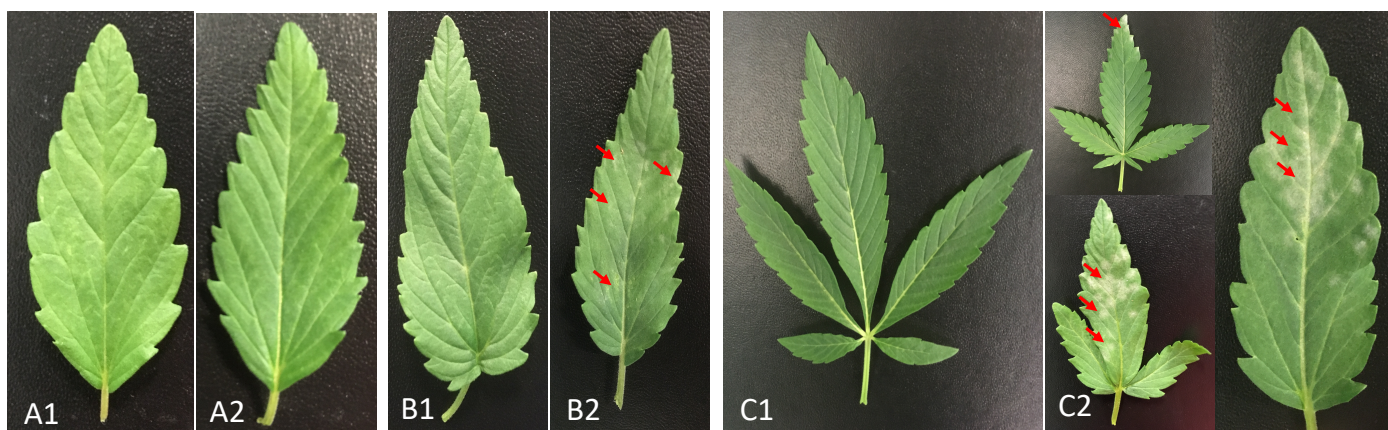

**Figure 1.** Hemp cv X59 leaf post infection. A1 and A2) Leaf sections from 5 days post inoculation (DPI). A1 and A2 represents uninoculated and inoculated leaf, respectively. B1 and B2) Leaf sections from 8 DPI. B1 and B2 represents uninoculated and inoculated leaf, respectively. C1 and C2) Leaf sections from 11 DPI. C1 and C2 represents

uninoculated and inoculated leaf, respectively. Solid red arrows indicate the powdery mildew infections on the leaf surfaces. 214 215

### 3.3 RNA Sequencing and Transcript Regulation in Response to PM Infection 216

Reference genome-guided transcriptomic analysis was applied to a total of 12 samples generated from three-time points (5, 8, and 11 DPI) and produced 595,546,388 clean reads (Table 1). 217 218  
A total of 476,314,050 reads were mapped to the reference genome [12]. There were 22,762 219  
genes that were expressed at all three-time points (i.e., with at least ten reads aligned to the reference genes). In total, 1,898 genes were significantly ( $q$ -value < 0.05) differentially expressed 220  
(DE) during fungal infection. Of these, 241, 315, and 910 were upregulated in the treated samples at 5, 8, and 11 DPI, respectively with the  $\log_2$  fold change ranging between 1.0 and 10.0, 221 222  
while 263, 266, and 988 genes were downregulated at 5-, 8-, 11- DPI, respectively with a  $\log_2$  223 224  
fold change ranging between -1.0 and -10.0 (Table 2). After correction for multiple testing, there 225  
were 504, 681, and 1,898 significantly differentially expressed genes at 5, 8, and 11 DPI respectively 226  
with the highest number of DEGs detected at 11 DPI (Table 2) and the pattern was consistent 227  
with an earlier study in other species [30]. Several DEGs were related to the perception, 228  
recognition, and transduction of pathogen-related signals, activation of the phytohormone signaling 229  
pathway, and triggering of pathogenesis-related genes. Most of the DEGs showed consistent 230  
patterns i.e., either increasing or decreasing in the expression values at all three-time 231  
points, and the genes were identified as strong candidates for further validation and investigation 232  
of their biological role in plant defense mechanisms against powdery mildew (Table S2). 233  
The functional study of some of these candidates is currently underway. 234

A few putative genes that were homologs of disease resistance-related genes, including disease resistance protein *At4g27190*-like (LOC115695607), ABC transporter G family member (LOC115714985), probable LRR receptor-like serine/threonine-protein kinase (LOC115709196), and serine/threonine-protein kinase SAPK3-like (LOC115716582) were downregulated at 5 DPI and upregulated ( $>3.8 \log_2$  fold) in the later stage (11- DPI) of infection. This pattern is somewhat consistent with the gene regulation in wheat challenged with *Zymoseptoria tritici* where many genes related to disease resistance were downregulated in the earlier infection stages and upregulated in the later stages [31]. Both *G. ambrosiae* and *Z. tritici* are biotrophic in nature and it is possible that when the infection becomes more severe, their signal transduction system is fine-tuned, and it is also likely that the host is capitalizing more resources on the synthesis of defense-related gene and proteins, thereby the expression level changes as the infection progressed to later stages.

RNA-seq results were validated by performing qRT-PCR on nine genes that were differentially expressed (Figure 3; Table S3). Gene candidates for qRT-PCR were selected randomly, and explicitly for the validation of the two techniques. All the tested genes had similar patterns of gene expression between RNA-seq and qRT-PCR  $\log_2$  fold change data (Figure 3).

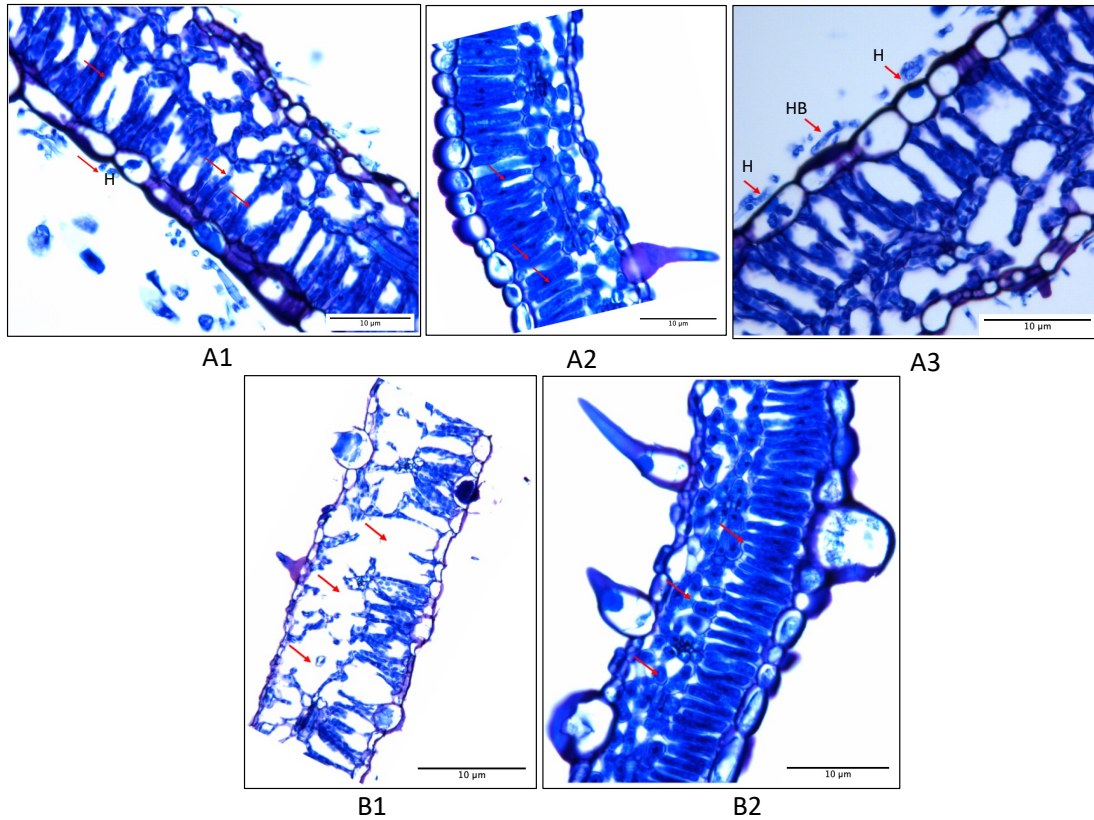

**Figure 2.** Toluidine blue stained leaf sections. A) Leaf sections from 8 DPI. A1 and A3 indicate infected tissues at 8-  
DPI, A2 indicates control or water inoculated tissues. B) Leaf sections from 11 DPI. B1 indicates inoculated leaf  
sections, B2 indicates control or water inoculated leaf sections. Red arrows indicate the modified palisade cells and big  
spaces between the cells; haustoria (H) and fungal hyphal bridge (HB) were also visible in the earlier stage of infection  
as indicated by red arrows in figure A1 and A3. Although the palisade cells have started deforming generating spaces  
between the cells, spongy cells look normal at this stage (A1 & A3). Both palisade and spongy cells were deformed by  
11 DPI (B1); however, epidermal, palisade, and spongy parenchymal cells appear normal in the uninoculated control  
tissues (A2 & B2).

### 3.4 Gene Ontology Enrichment Analysis

By the end of 11 DPI, 81 unique GO terms were significantly (FDR <0.05) enriched (Table S4); some of the highest-level categories included cellular (GO:0009987), metabolic process (GO:0044237), and biosynthetic process (GO:0009058), response to – stimulus (GO:0050896), –

stress (GO:0006950), and - biotic stimulus (GO:0009607). There were categories directly related 264  
to host-pathogen interactions such as response to -fungus (GO:0009620), - chitin (GO:0010200), - 265  
bacterium (GO:0042742), and - external stimulus (GO:0009605). Associated with these catego- 266  
ries, there were several DEGs annotated as chitinases, resistance genes containing TNL (TIR- 267  
NBS-LRR) domains, and powdery mildew specific genes (Figure 4; Table S4). Categories such 268  
as cellular- (GO:0044237), primary- (GO:0044238), secondary- metabolic process (GO:0019748), 269  
and phenylpropanoid biosynthetic pathways (GO:0009699) were some of the highest-level en- 270  
riched categories in metabolic processes. Other highly enriched categories included protein 271  
metabolic process (GO:0019538), biosynthetic processes (GO:0009058), and response to hor- 272  
mone stimulus (GO:0009725) (Table S4). The enrichment of hormone-related categories reflects 273  
the fundamental role of phytohormones in the plant-pathogen interaction and defense system. 274  
Phytohormones such as salicylic acid (SA), jasmonic acid (JA), and ethylene (ET) play a crucial 275  
role in regulating physiological processes, including plant immunity and the primary defense 276  
against fungal pathogens [32]. 277

The GO functional categories of external stimulus (GO:0009605) and response to other or- 278  
ganisms (GO:0051707) included some plant defence-related genes. Among the upregulated 279  
genes were several genes homologous to receptors of pathogen signals such as CNL (CC-NBS- 280  
LRR), RLK (receptor-like kinases), RLP (receptor-like proteins), and TNL (TIR-NBS-LRR) (Fig- 281  
ure 4). Specific genes such as chitin elicitor receptor kinase 1 (*CERK1*), enhanced disease re- 282  
sistance 2, (*EDR2*), and powdery mildew resistant 5 (*PMR5*) protein) were highly upregulated. 283  
Many of these genes and several others are discussed in more detail below in reference to Fig- 284  
ure 4. 285

### 3.5 Resistance Genes (*R*-genes)

To date, over 200 R genes in *Arabidopsis* have been reported (http://www.prgdb.org/prgdb/plants/?id=151). Seven types of domains have been defined within them: nucleotide-binding site (NBS), leucine-rich repeat (LRR), toll/interleukin-1 receptor (TIR), coiled-coil (CC), serine-threonine kinase (STK), transmembrane (TM), and leucine zipper (LZ). These domains have been combined into seven categories namely, CC (coiled-coil), CNL (CC-NBS-LRR), RLK (receptor-like kinases), RLP (receptor-like proteins), Pto (Ser/Thr kinase protein), NLR (NBS-LRR), and TNL (TIR-NBS-LRR) [33]–[37]. In this study, there were 11 putative TNL genes, 11 RLPs, and 4 RLK-like genes that were differentially expressed (Table S5-A). Twenty-three of them were upregulated and three of them were downregulated by 11 DPI. Among the receptor-like proteins, six putative genes (LOC115700527, LOC115704090, LOC115704207, LOC115705649, LOC115706090, and LOC115725564) that were homologs of receptor-like protein 52 (RLP52) were consistently upregulated by 11 DPI. Given that R genes recognize pathogen effectors and play a vital role in gene-for-gene interaction, they are identified as crucial members of the plant immune system. These surveillance gene transcripts are expected to be expressed consistently even at low levels in response to the pathogen; however, two of the genes, LOC115713248 (receptor-like protein kinase 2) and LOC115705057 (protein too many mouths) were downregulated as the infection progressed to 11 DPI. The decrease in transcript abundance of R genes is modulated by the host micro-RNA and it is observed in the absence of a pathogen interference [38]. However, we saw quite the opposite for the two genes. Although it is unclear why the genes were downregulated, it is likely indicating the susceptibility factor, which is a subject of further exploration. Similar observations were made in flax

transcriptome study, flax seedlings infected with fungal pathogen also reported the downregulation of the two similar R genes [39]. Furthermore, a predicted gene (LOC115708252) homologous to disease resistance RPP13-like protein, containing a CNL domain, was consistently upregulated  $>3.0 \log_2$  fold by 11 DPI, indicating that the gene is strongly involved in the host-pathogen interaction. An earlier report has demonstrated that *RPP13* provides resistance against downy mildew [40]. Similarly, RPP13-like protein was reported to play a vital role in the perception of bacterial effectors; its loss of function led to susceptibility to biotrophic microbe (*Xanthomonas campestris* pv. *campestris*) and diminished resistance to *P. syringae* [35], [41]–[43]. Thus, the gene (LOC115708252) is potentially important for further exploration of the resistance mechanism in cannabis. Similarly, among the TNL-related genes, four of them (LOC115711545, LOC115712128, LOC115712737, and LOC115706872) were expressed  $>4.0 \log_2$  fold. Taken together, this study revealed several putative genes homologous to *RLP52*, *RPP13*, and other CNL / TNL domains that are potentially involved in the plant-pathogen response and are suitable candidates for further investigation of the resistance mechanism. However, not all of the R genes can contribute equally to durable resistance against PM, thus combinations of multiple R genes and other genes such as adult plant resistance (APR) genes (discussed below) into a single plant have been demonstrated effective in gaining durable resistance against fungal diseases in cereal crops [44]. There is a potential that some of the identified R and APR genes, upon validation of their biological role, particularly those that were upregulated or downregulated consistently at all three-time points, can be combined using the gene pyramiding method through traditional breeding practices or modern genomics tools such as genome editing and develop elite cannabis variety that can confer durable resistance to the pathogen.



### 3.6 Mitogen-Activated Protein Kinase (MAPK) Signaling in Response to PM Infection

The mitogen-activated protein kinase (MAPK) cascade is a primary signal transduction pathway in higher eukaryotes and plays a vital role in plant development and pathogen response [45]–[48]. Plants employ multi-step defense responses against pathogens, beginning with activation of the kinase upon perceiving PAMPs/MAMPs and pathogen effectors [49]. In the present study, 13 kinases were differentially expressed representing *MAPKKK1*, *MAPKKK5*, *MAPK3*, *MAPK6*, *MAPKKK NPK1*, and serine/threonine-protein kinase *EDR1* (Figure 4; Table S5 - B) and eleven of them were upregulated. A predicted gene (LOC115712285), homologous to *MAPKKK* serine/threonine-protein kinase *EDR1* was increased > 5.0 log<sub>2</sub> fold. Earlier studies have demonstrated that *EDR1* plays a key role in the regulation of MAP cascade and aids in the sensing and conferring resistance against fungal diseases including powdery mildew [48]–[52]. Similarly, two predicted genes (LOC115711057 and LOC115719682), homologous to mitogen-activated protein kinase 3 (*MPK3*), were consistently upregulated as the infection progressed to 11 DPI (Figure 4). An earlier study on *MPK3* demonstrated that upon *B. cinerea* infection, *MPK3* was activated and induced camalexin synthesis in *Arabidopsis* [53]. Likewise, Asai et al [34] demonstrated that the activation of the MAPK cascade provided resistance against both fungus and bacterial pathogens. Thus, it is reasonable to speculate that the upregulated genes in the pathogen-challenged groups are strongly associated with cannabis and PM disease interaction, and these genes are potential candidates for further functional characterization and investigation of biological role in mediating resistance response against the PM disease.

**Table 1.** RNA-Seq statistics

354

| Sample*        | Repli-<br>cate | Read<br>Length<br>(bp) | Clean<br>Reads     | Tophat<br>Mapped<br>Reads | %<br>Mapped  |
|----------------|----------------|------------------------|--------------------|---------------------------|--------------|
| 5 DPI Control  | 1              | 100                    | 50,442,788         | 40,747,771                | 81           |
| 5 DPI Control  | 2              | 100                    | 50,238,782         | 40,132,936                | 80           |
| 5 DPI Treated  | 1              | 100                    | 50,330,184         | 40,611,199                | 81           |
| 5 DPI Treated  | 2              | 100                    | 50,408,094         | 40,869,038                | 81           |
| 8 DPI Control  | 1              | 100                    | 50,467,426         | 40,412,470                | 80.1         |
| 8 DPI Control  | 2              | 100                    | 42,009,774         | 34,733,598                | 83           |
| 8 DPI Treated  | 1              | 100                    | 50,664,596         | 39,380,153                | 78           |
| 8 DPI Treated  | 2              | 100                    | 51,100,826         | 39,079,529                | 76.5         |
| 11 DPI Control | 1              | 100                    | 49,874,138         | 41,146,063                | 82.5         |
| 11 DPI Control | 2              | 100                    | 50,359,286         | 41,835,600                | 83.1         |
| 11 DPI Treated | 1              | 100                    | 49,030,140         | 38,728,524                | 79           |
| 11 DPI Treated | 2              | 100                    | 50,620,354         | 38,637,169                | 76.4         |
| <b>Total</b>   |                |                        | <b>595,546,388</b> | <b>476,314,050</b>        |              |
| <b>Average</b> |                |                        | <b>49,628,866</b>  | <b>39,692,837.5</b>       | <b>80.13</b> |

\*DPI (Days Post Inoculation)

355

### 3.7 Transcription factor (TFs) in Response to PM Infection

356

In the natural environment, plants are unremittingly exposed to abiotic and biotic stressors, which affect plant growth and development. Upon pathogen invasion, transcriptional reprogramming occurs, and transcription factors (TFs) are employed in the defense signaling

357

358

359

mechanism, interacting, and binding with stress-related genes in a sequence-specific manner 360  
orchestrating the gene expression in response to the microbial invader [54]. In this study, 243 361  
plant TFs were differentially expressed, 172 of them were upregulated and 71 were downregu- 362  
lated (Table S6). Among the TFs, six major TF families, *bHLH*, *ERF*, *MYB*, *NAC*, *WRKY*, and 363  
*bZIP* were well represented in the data set (Table S6) and these TFs were demonstrated highly 364  
regulated in response to biotic and abiotic stress response [54]–[56]. As the master regulators of 365  
plant defense response, these TFs were either up or downregulated in different plant species. 366  
For instance, the *bZIP* TF showed prominent activation in response to *Ustilago maydis* infection 367  
in maize [57]. In the current study, there were a total of eight *bZIP* TFs that were differentially 368  
expressed; of them, four genes were upregulated, and the remaining four were consistently 369  
downregulated at 5-, 8-, and 11- DPI (Table S6). Similarly, the *WRKY* protein family with the 370  
signature conserved domain, *WRKY-DBD*, plays a vital role in the recognition of the W-Box ele- 371  
ment and positively modulating and activating the early defense-related genes such as PAMP 372  
responsive genes [57]–[60]. There was a total of 23 *WRKY*-related genes that were differentially 373  
expressed. Of them, 18 were upregulated, while four were downregulated. Six genes were ex- 374  
pressed  $>5 \log_2$  fold due to the pathogen interaction (Table S6). Some of the differentially ex- 375  
pressed putative genes, LOC115707546 (homologous to *WRKY46*), LOC115715968 (homologous 376  
to *WRKY53*), and LOC115707511 (homologous to *WRKY DNA-binding transcription factor 70*) 377  
were linked to the positive regulation of resistance against *Pseudomonas syringae* in *Arabidopsis* 378  
[61]. While the transcriptional reprogramming of *WRKY53* precisely regulates oxidative re- 379  
sponses to both biotic and abiotic stresses, *WRKY46* and *WRKY70* together enhance resistance 380  
to *P. syringae* potentially by increasing the expression of salicylic acid (SA) dependent genes [61] 381

[62]. Given that *WRKY53* plays a fundamental role in response to both biotic and abiotic stresses in wheat and rice, overexpression of the TF has enhanced the accumulation of PR proteins and reduced the infection from rice blast fungus, *Magnaporthe oryzae* [63]. Notably, the two genes (LOC115715968 and LOC115707511) homologous to *WRKY53* and *WRKY70*, increased expression  $>7 \log_2$  fold in response to the *G. ambrosiae* (Table S6) and the transcript abundance of the genes increased gradually in the treated groups with the progression of infection, indicating that the genes were strongly involved in the PM and cannabis interaction. Thus, all three genes (LOC115707546, LOC115715968, and LOC115707511) are considered as potential candidates for further investigation against the PM disease in cannabis.

Similar to the *WRKY* transcription factor families, some *MYB* TFs form a complex network of regulatory responses against the biotic stress [64]. In response to *G. ambrosiae*, 32 genes were differentially expressed, seven genes were downregulated, and 25 were upregulated; of which, five putative genes (LOC115721787, LOC115705224, LOC115705243, LOC115711509, and LOC115711509) have transcript abundance  $>5 \log_2$  fold (Table S6). Earlier studies showed that *MYB44* was involved in defense response against *Alternaria brassicicola* in *Arabidopsis*, *AtMYB44* regulated transcriptional activation of *WRKY70* and induced defense response against *A. brassicicola* [65]. The presumed homolog of *MYB44* (LOC115711127) showed transcript abundance gradually increased  $>3 \log_2$  fold as the disease progressed to 11 DPI (Table S6).

While most of the TFs discussed above were upregulated, there were seven genes related to *MYB* that were downregulated consistently at all three-time points in response to the pathogen indicating a potential susceptibility factor (Table S6). *MYB* related TFs, for instance, *myb46*

knockdown mutant showed increased resistance against *B. cinerea* [66]. Moreover, there were 403  
other TFs with genes that were downregulated, *WRKY* (four genes), *NAC* domain (three genes), 404  
*bHLH* (two genes), *bZIP* (four genes), and *ERF* (two genes) (Table S6). Although TFs constitute a 405  
large family of proteins and the functional role of many of them is yet to be characterized, some 406  
of the earlier studies on TFs have demonstrated both the positive and negative roles in the plant 407  
immunity response [67]–[69]. For instance, *NAC* is one of the well-studied TFs and they were 408  
confirmed as both positive and negative regulators of defense-related genes [70]. Many of the 409  
TFs are induced under pathogen influence and play a vital role in linking signal transduction 410  
processes between defense-related phytohormones and ROS-related pathways during plant 411  
and pathogen interaction. Overexpressing *NAC6* and *NAC111* in rice have enhanced tolerance 412  
to rice blast and bacterial blight, respectively [71], [72]. Similarly, *NAC122* and *NAC131* were 413  
induced by *Magnaporthe oryzae* infection and demonstrated a positive regulatory response 414  
against the rice blast resistance [73]. On the contrary, overexpression of *NAC4* has led to in- 415  
creased cell death and damage of cell membrane in rice [70]. Similarly, *NAC069* demonstrated a 416  
negative regulatory role in lettuce; however, when silenced, enhanced the resistance trait 417  
against *Pseudomonas cichorii* bacteria [74]. Taken together, several of the identified genes were 418  
strongly involved in cannabis interaction and PM disease interaction and they will be strong 419  
candidates for further investigation of defense mechanism; while some of the DEGs that were 420  
activated during interaction could also reflect induced disease susceptibility factor, which is 421  
again a subject of further functional validation. 422

### 3.8 Genes Related to Secondary Metabolic Pathways in Response to PM Infection

Secondary metabolites serve a range of vital functions in plants including defense roles [75]. Some flavonoids and terpenoids have been reported to exhibit antimicrobial properties. Terpenoids from oregano oil showed promising antifungal activity [77]. Similarly, several cannabinoids have shown potent antimicrobial activity [78]. Thus, these secondary metabolites play a crucial role in the defense role against microbial pathogens including biotrophic fungus. In the current study, 13 genes related to flavonoid synthesis were upregulated, 10 of them upregulated >3.0 fold by 11 DPI (Figure 4; Table S5-C). Five homologs of flavanone 3-dioxygenase (LOC115714362, LOC115722328, LOC115722326, LOC115707397, and LOC115696581) were consistently upregulated as the infection progressed to 11 DPI. Transcript, LOC115722326, was upregulated >5 log<sub>2</sub> fold. The substrate(s) of the enzyme encoded by this flavanone 3-hydroxylase (F3H) genes is unknown; however, a previous study has shown that the F3H converts 2S-naringenin to (2R, 3R)- dihydrokaempferol [79]. Moreover, in another study, the compound was highly expressed in response to the infection caused by *Endoconidiophora polonica* [80]. The enzyme is also in the biosynthetic pathway for catechin, another pathogen-defensive molecule [80]. Furthermore, among the enriched GO terms, the secondary metabolic process (GO:0019748) was one of the highly enriched terms potentially indicating the importance of genes that were involved in the biosynthesis of metabolites in response to the PM infection.

There were eight terpene-related genes that were significantly differentially expressed following *G. ambrosiae* infection (Table S5-D). Homologs of terpene synthase, geranylgeranyl pyrophosphate synthase, farnesyl pyrophosphate synthase 1, and germacrene B synthases were well-represented in the dataset and most of them were upregulated by 11 DPI. Notably, one of

the putative terpene synthase genes, LOC115716806, was consistently upregulated at all three 446  
time points and showed  $> 8.0 \log_2$  fold by 11 DPI. Earlier studies have showed that overexpres- 447  
sion of terpene synthase in rice conferred enhanced resistance to the fungus *Magnaporthe oryzae* 448  
[81]. 449

Some cannabinoids have shown potent antimicrobial activity [78]. Our data showed that 450  
nine genes putatively associated with the cannabinoid biosynthesis pathway were significantly 451  
differentially expressed (Figure 4; Table S5-E). Of these, two were downregulated and seven 452  
were upregulated. Although there is a dearth of scientific evidence to support the antifungal 453  
properties of cannabinoids *in planta*, limited *in vitro* studies have shown that some of the active 454  
cannabinoids have shown antifungal activities against *Cryptococcus neoforms* and *Candida albi-* 455  
*cans* [80]–[84]. 456

Thus, the differential expression of the putative genes involved in the secondary metabolic 457  
pathways indicates the plant response to the pathogen. Many of the cannabis homologs espe- 458  
cially the upregulated putative genes are potentially linked to the plant and pathogen interac- 459  
tion and can be suitable biomarkers to further investigate the defense mechanism against the 460  
pathogen. 461

### 3.9 Phytoalexin Synthesis and Regulation In Response to PM Infection 462

Phytoalexins are low molecular mass organic compounds that are produced against patho- 463  
gens and inhibit their establishment, metabolism, and development in a host plant [85]. In the 464  
present study, 36 genes that were related to phytoalexin were differentially expressed, 32 of 465  
them were consistently upregulated at all three-time points with 8 putative genes that were  $>5.0$  466

log<sub>2</sub> fold change. Two genes (LOC115707097 and LOC115708777) that were homologous to indole acetaldoxime dehydratase (*CYP71A13*) were upregulated consistently at all three-time points (Table S5-F). Plants carrying the *cyp71A13* mutation were highly repressed in the production of camalexin upon challenged by *Pseudomonas syringae*; however, when the mutants were supplied with indole-3-acetonitrile exogenously, camalexin synthesis was restored. Thus, it was concluded that the homolog was potentially involved in conferring resistance against the pathogen [86]. Similarly, two genes (LOC115725714 and LOC115702757) homologous to dolabradiene monooxygenase were continually upregulated > 2.0 log<sub>2</sub> fold by 11 DPI. Earlier study in maize demonstrated that the transcript accumulation for the homolog was increased in response to two fungal pathogens (*Fusarium verticillioides* and *F. graminearum*) [45]. Finally, two putative genes (LOC115698743 and LOC115698987) homologous to momilactone synthase was differentially expressed at all time points. The transcript abundance in the control samples was very low to undetectable at all three-time points, while the transcript gradually increased in the treated samples (Figure 4; Table S5-F). An earlier study in rice demonstrated that the homolog was involved in the chemical synthesis of momilactone phytoalexins [47] and this diterpenoid secondary metabolite plays an essential role in the plant-pathogen interaction. Thus, the putative genes that showed consistent expression patterns at all three-time points in response to the pathogen indicate a strong biomarker for further investigation of cannabis and PM interaction.

### 3.10 Hormone Regulation in Response to PM Infection

Soon after pathogen perception, transcriptional changes trigger hormone signaling [87].

There are multiple phytohormones involved in the defense response, primarily salicylic acid



(SA), jasmonic acid (JA), and ethylene (ET) [88] are the key players. Our study revealed 13 SA-related genes that were differentially expressed, and all 13 DEGs were upregulated consistently at all three-time points. There were five genes (LOC115706872, LOC115721689, LOC115722335, LOC115695436, and LOC115722326) that were upregulated  $>3 \log_2$  fold by 11 DPI (Figure 4; Table S5-G) and the transcript abundance increased as the infection progressed to 11 DPI (Figure 4; Table S5-G). Of them, one putative gene, LOC115720854 [homologous to calmodulin-binding protein 60 G (*CBP60G*)] was linked to the transcription activation of SA pathway genes and other defense related genes in *Arabidopsis*; notably, overexpression of *CBP60G* in *Arabidopsis* contributed to the SA accumulation, microbe-associated molecular patterns (MAMPs) recognition and subsequently enhanced resistance to *P. syringae* [89]. There are several genes associated with the accumulation of SA, genes such as phytoalexin deficient 4 (*PAD4*), enhanced disease susceptibility 1 (*EDS1*) were involved in the SA regulation [90]. The predicted genes, LOC115715124 (homologous to *PAD4-like*), and LOC115711424 (homologous to *EDS1-like*) were upregulated  $>3 \log_2$  fold change by 11 DPI (Figure 4; Table S5-F). Moreover, homologs of other positive SA regulators, such as LOC115715663 and LOC115700633 [homologous to nonrace-specific disease resistance 1 (*NDR1*)] and LOC115706872 and LOC115725742 [homologous to suppressor of *npr1-1* constitutive 1 (*SNC1*)], were differentially expressed and the transcript abundance for these putative genes increased by 11 DPI (Figure 4; Table S5-F). There were five DEGs representing *DLO1* genes (LOC115717114, LOC115721689, LOC115722335, LOC115695436, and LOC115722326), where the latter four were upregulated  $> 4$  folds, although they were not involved in the pathogen resistance and were regarded as partially redundant and suppressor of immunity, these genes were differentially expressed indicating strong host response to the

fungus and could be a potential susceptible factor in response to the pathogen (Table S5-G) [91].  
Additionally, GO enrichment showed phenylpropanoid biosynthetic process (GO:0009699),  
phenylpropanoid metabolic process (GO:0009698), and response to hormone stimulus  
(GO:0009725) as the most enriched categories (Table S4). Given that SA pathway is well studied  
and there are several transcriptomic studies where SA related biosynthetic processes were en-  
riched and genes were upregulated in response to fungal diseases including powdery mildew  
[30], [92]. Information revealed from this study aligns well with those earlier findings indicating  
that the genes identified can be strong candidate for further exploration of *G. ambrosiae* and can-  
nabis interaction in mediating resistance against the pathogen.

Along with SA, both ET and JA play a crucial role in the activation of defense system  
against pathogens. Assessment of ET biosynthetic pathway revealed 15 ET-related genes that  
were upregulated by the 11 DPI with four putative genes (LOC115722326, LOC115707727,  
LOC115696581, and LOC115695436) with expression level  $>4 \log_2$  fold change (Figure 4; Table  
S5-H). Two genes (LOC115717044 and LOC115696842) represented the 1-aminocyclopropane-1-  
carboxylic acid (ACC) synthase (ACS), a rate-limiting enzyme of ET biosynthesis pathway, and  
11 genes represented 1-aminocyclopropane-1-carboxylate oxidase (ACO) and two genes repre-  
sented ethylene-responsive transcription factor 1B (ERF1B) and are upregulated by  $>4 \log_2$  fold  
change at the 11 DPI (Figure 4; Table S5-H). The activation of these ET-related genes by plant  
host upon fungal challenge was reported in an earlier study in flax [39]. While ET plays a vital  
role in the plant developmental process and in plant-biotic response, a comprehensive role of  
ET synthesis during biotic interactions is poorly understood, ET can also function as a negative  
signaling factor during host and pathogen interaction. Zhao et al [93] demonstrated that *rice*

*dwarf virus-induced* ethylene production by stimulating S-adenosyl-L-methionine synthetase, a key player in ET biosynthesis, in rice. Thus, upregulation of ET-related genes is an indication of successful pathogen interaction, but it may not always indicate a resistance factor. However, *ERF1B*, a transcriptional activator, is one of the crucial genetic markers involved in plant defense response against necrotizing fungus (*Botrytis cinerea* and *Plectosphaerella cucumerina*) [94], [95], and earlier studies have revealed that the overexpression of the transcription factor conferred resistance against broad range of necrotizing and soil borne fungal pathogens [39], [91]. Although all of the ethylene related genes detected in the study were upregulated in response to the pathogen, it is of note that *ERFs* and other ET related genes are also versatile in nature and they are induced not only in response to biotic stress, but also their upregulation implies developmental changes and orchestration of progress in pathogen in the tissue level [96].

**Table 2.** Differentially expressed genes (DEGs) detected at each time point post-inoculation

| Day post-inoculation (DPI) | Number of DEGs ( $q < 0.05$ )* | Upregulated DEGs ( $q < 0.05$ )* | Downregulated DEGs ( $q < 0.05$ )* |
|----------------------------|--------------------------------|----------------------------------|------------------------------------|
| 5                          | 504                            | 241                              | 263                                |
| 8                          | 681                            | 315                              | 266                                |
| 11                         | 1898                           | 910                              | 988                                |

\*After correction for multiple testing

JA is also involved in the defense against plant pathogens [97]. Our study revealed 20 putative JA-related genes that were differentially expressed, and a majority of these were upregulated by 11 DPI (Table S5-I). Given that JA is a well-studied defense hormone and genes that

were primarily involved in the JA synthesis, allene oxide cyclase (*AOC*), lipoxygenase 2 (*LOX2*),  
and allene oxide synthase (*AOS*) were identified and their abundance was gradually increased  
over the course of time and upregulated >2 fold by 11 DPI (Table S5-I). Moreover, there were  
ten genes homologous to cytochrome P45094B3 (*CYP94B3*) and the majority of them were up-  
regulated by 11 DPI. Earlier studies have shown that *CYP94B3* employs negative feedback con-  
trol mediating catabolism of jasmonyl-L-isoleucine [98]. Concurrent transcript upregulation of  
both JA synthesis genes and their repressors were also found in *Arabidopsis* [55]. This indicates  
the balance of JA production potentially maintains the excess levels of the compound in the  
plant system [56], [97], [98]. Taken together, the genes identified in this study demonstrate clear  
alignment with earlier studies, which validates that the data is reliable; and it is safe to specu-  
late that the genes identified in this study can potentially be a dependable source to further in-  
vestigate cannabis and PM disease interaction, which is still far from a thorough investigation.

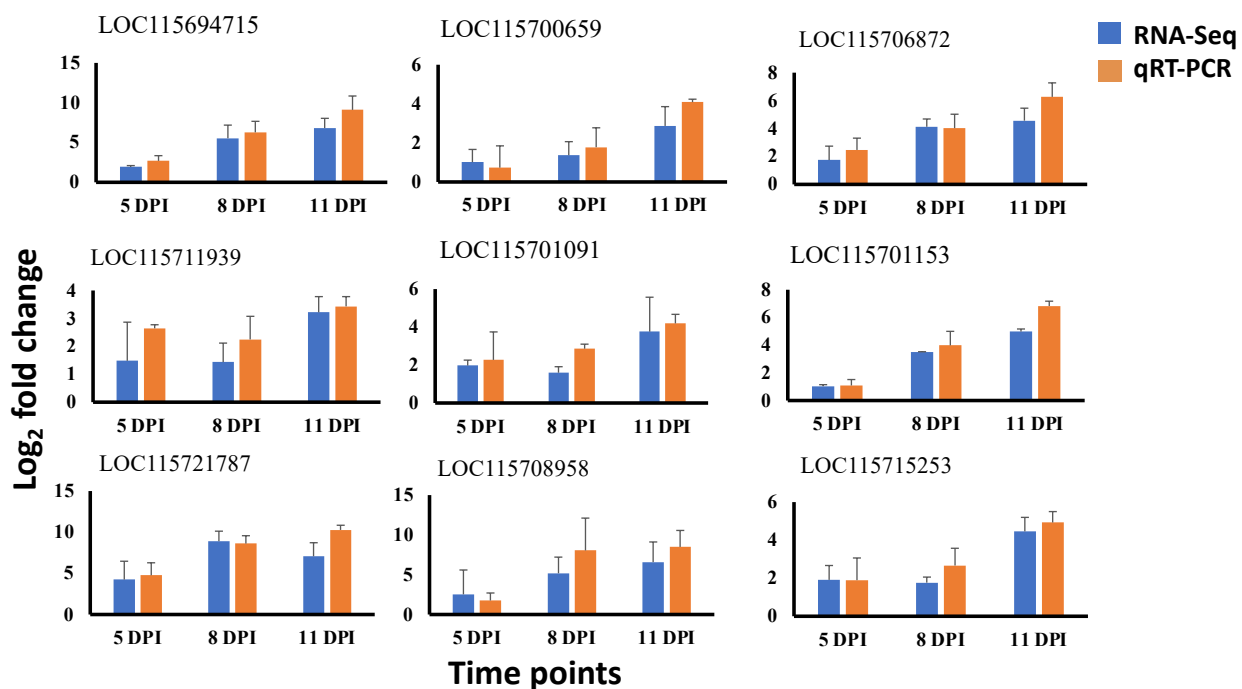

**Figure 3.** Comparison of gene expression pattern, qRT-PCR vs RNAseq. From the pool of RNAseq expression values, nine putative disease resistance related genes were selected and used for qRT-PCR validation. The ids starting with 'LOC11...' represent the gene ids corresponding to the original IDs in the reference genome [12]. Their corresponding gene sequences can be obtained from- [https://ftp.ncbi.nlm.nih.gov/genomes/all/annotation\\_releases/3483/100/GCF\\_900626175.1\\_cs10/](https://ftp.ncbi.nlm.nih.gov/genomes/all/annotation_releases/3483/100/GCF_900626175.1_cs10/). Y-axis represents the log<sub>2</sub> fold change and the x-axis represents the time points after the fungal inoculation. Error bar represents the standard error mean.

### 3.11 Glycosyl Hydrolases in Response to PM Infection

Plants respond to fungal pathogens by producing enzymes such as chitinase and  $\beta$ -1, 3-glucanase, which dissolve components of a fungal cell wall, such as chitin and  $\beta$ -1, 3-glucan [99]. The degradation of fungal cellular components inhibits microbial establishment and colonization on a plant host; moreover, pathogen-associated molecular patterns (PAMPs) are readily available to plant pattern recognition receptors (PRRs), thus preventing the microbes from entering the host. In this study, there were 14 differentially expressed genes that were the homologs of chitinase and glucanase genes (Figure 4; Table S5-J). There were three homologs of endo-chitinase EP3-like genes (LOC115708024, LOC115699396, and LOC115708023) that were putatively involved in the endo-hydrolysis of chitin molecules [100]. Transcript abundance of all three genes gradually increased and for the latter two, log<sub>2</sub> fold change was > 4.50 by 11 DPI. An earlier transcriptomic study in cannabis demonstrated that under PM infection, among several other genes, chitinase-related genes were differentially expressed indicating their potential role in the pathogen response [18]. Furthermore, this study identified seven putative glucan endo-1, 3- $\beta$ -glucosidase genes that were differentially expressed, five of them were downregulated, and two genes (LOC115710105 and LOC115710100) were upregulated > 5.0 log<sub>2</sub> fold change by 11 DPI. Some of

these putative glucosidase genes showed contrasting changes in transcript abundance (Figure 4; 586  
Table S5-J). In earlier studies, overexpression of glucanase gene (*ScGluD2*) in *Nicotiana benthamiana* 587  
conferred resistance against *Ralstonia solanacearum* and *Botrytis cinera* [101]. In contrast, when *Ara-* 588  
*bidopsis* seedlings were challenged with a novel strain (30C02) of cyst nematode, relative expres- 589  
sion of glucan endo-1,3- $\beta$ -glucosidase (*At4G16260*) declined after 3-5 days post root infection [102]. 590  
Further investigation on the *At4G16260* mutant showed increased susceptibility to the pathogen 591  
while overexpression of the gene conferred improved tolerance to the pathogen indicating that the 592  
gene was involved in the pathogen response [102]. Thus, the upregulated homologs of chitinases 593  
and glucanases indicate a strong interaction between *G. ambrosiae* and cannabis and potentially be 594  
suitable biomarkers for further investigation of the plant defense response against the pathogen. 595

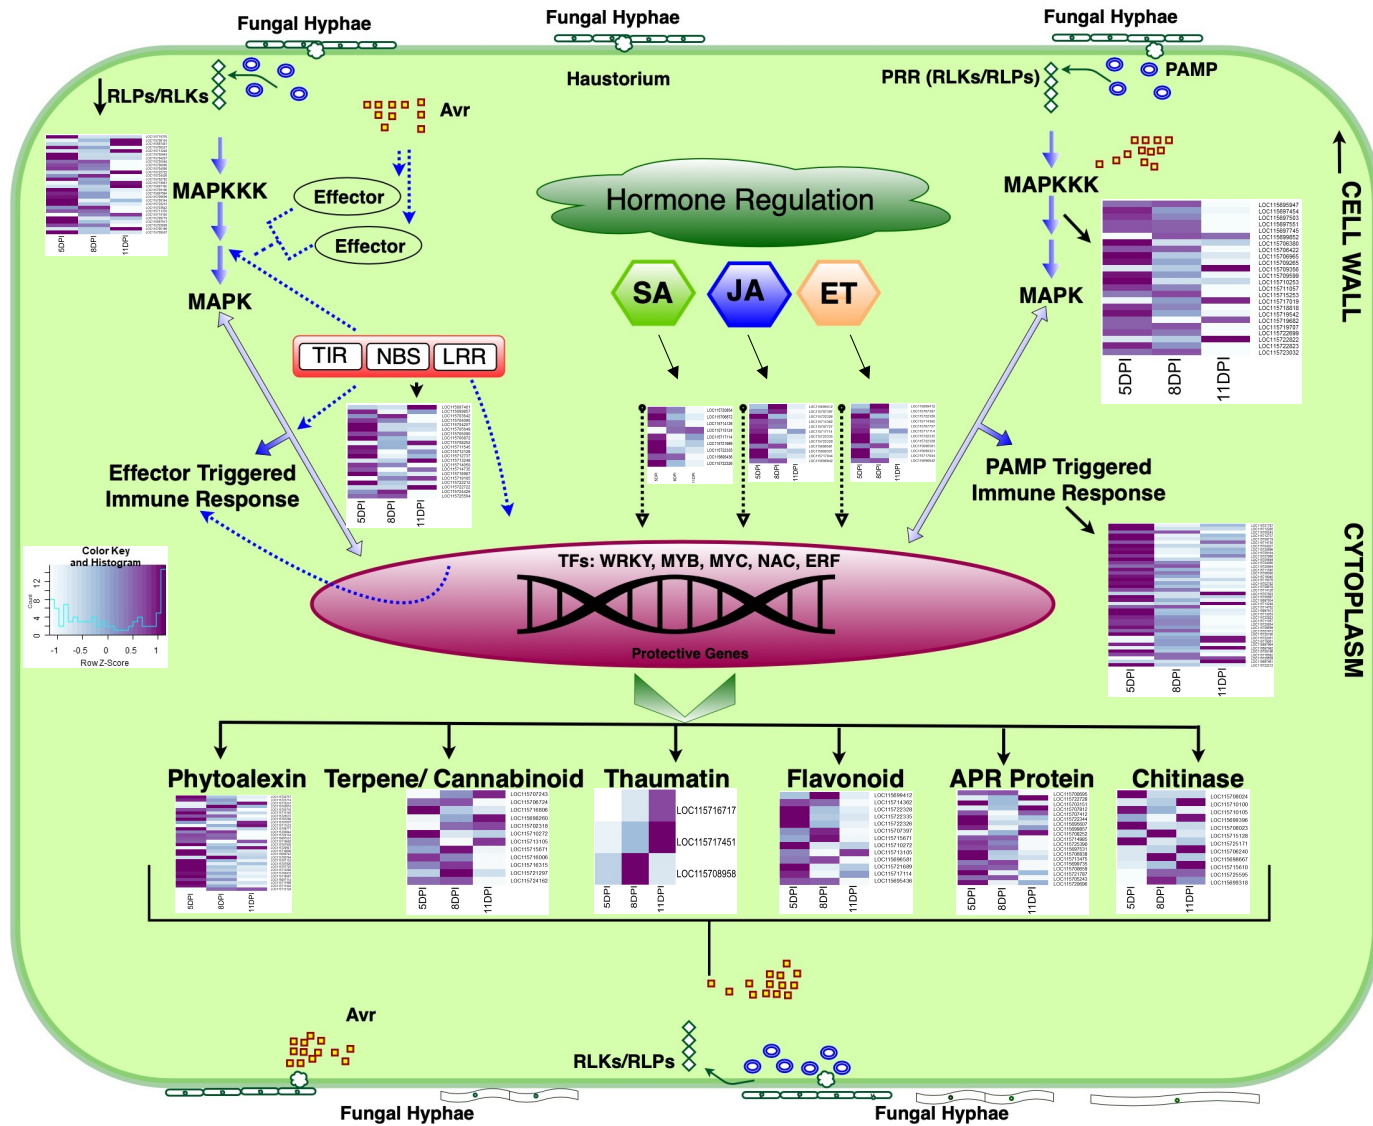

**Figure 4.** Schematic diagram showing plant-fungal interaction upon PM inoculation in cannabis. Heatmaps for log<sub>2</sub>- 597  
fold change values at 5-, 8-, and 11- DPI were shown besides each major molecular steps in the plant-pathogen 598  
interaction pathway. Dark purple indicates downregulation and light color indicates upregulation. Putative genes that 599  
were shown in the heatmap were significantly differentially expressed at least at one time point ( $q < 0.05$ ). During the 600  
course of fungal infection, pathogen produces elicitors such as PAMPs and effectors, upon perceiving the foreign 601  
molecular patterns, host receptors RLKs/ RLPs and R genes interact with the elicitors, and the interaction leads to the 602  
activation of primary signal transduction pathway such as MAP kinase. Eventually, transcription factors are regulated 603  
and a whole host of defense related molecular changes takes place, including activation of phytohormone (SA, JA, and 604  
ET) biosynthetic pathway and secondary metabolism related genes. Glycosyl hydrolases (chitinase and  $\beta$ -1, 3- 605  
glucanase) acts on the degradation of fungal cell wall; likewise, thaumatin and defensin permeabilize membrane 606

bilayers of microbial cells and interfere with the microbial protein synthesis, other low molecular mass organic 607  
compounds such as phytoalexin inhibit the establishment and metabolism of pathogen activities, thereby inhibiting 608  
fungal establishment, colonization, and infection on the host cells. Moreover, secondary metabolites such as 609  
flavonoids and terpenes play a vital role in the antioxidant activity against reactive oxygen species produced during 610  
pathogen invasion. Avr = Avirulence factor; RLP = Receptor like proteins; RLK = Receptor like kinase; SA = Salicylic 611  
acid; JA = Jasmonic acid; ET = Ethylene; PRR = Pathogen recognition receptor; PAMP = Pathogen associated molecular 612  
pattern; MAPK = mitogen-activated protein kinase; TIR = toll/interleukin-1 receptor; NBS = nucleotide binding site; 613  
LRR = leucine rich repeat APR = adult plant resistance 614

### 3.12 Thaumatin in Response to PM Infection 615

Defensin- and thaumatin-like proteins (TLPs) interfere with microbial protein synthesis and 616  
their functions, thereby inhibiting pathogen infection to the host plant [18]. There were 31 genes 617  
with significant BLAST hits representing thaumatin related genes (data not shown), however, only 618  
three of these were significantly differentially expressed in response to *G. ambrosiae* with one of the 619  
genes (LOC115716717) that was homologous to thaumatin-like protein upregulated by  $>5 \log_2$  fold 620  
change (Figure 4; Table S5-K). Similarly, two other genes (LOC115717451 and LOC115708958) rep- 621  
resenting thaumatin-like proteins were upregulated ( $>2 \log_2$  fold). Similar to this study, when can- 622  
nabis was challenged with PM disease, 23 TLPs were revealed indicating that TLPs play a crucial 623  
role during plant and PM interaction [18]. These antifungal thaumatin-like proteins lyse microbial 624  
cells by forming transmembrane pores in the fungal membrane [103]–[106]. Albeit several of these 625  
TLPs are yet to be functionally validated, many of the genes encoding these antimicrobial peptides 626  
are associated with defense mechanism in other plant species. Thus, homologs identified in this 627  
study are potential biomarkers to further investigate defense mechanisms in cannabis and PM in- 628  
teraction. 629



### 3.13 Adult Plant Resistance (APR) Genes in Response to PM Infection

Plants carry numerous resistance genes coding for immune receptors (TNL or CNL) and they are activated in all parts of the plant and are effective at all developmental stages; however, there are specific resistance genes that are expressed later in the adult stage towards maturity and these are categorized as the adult plant resistance (APR) genes [107]. Although APR genes represent a minority of known R genes, these genes have been applied in wheat breeding programs for decades [107]. In this study, there were 16 genes that were homologous to four different APR genes, *Lr22a*, *Lr34*, *Lr67*, and *Xa21*, and were differentially expressed. Of these, 12 genes were upregulated and 4 of them were downregulated (Figure 4; Table S5-L). Based on the protein sequence similarity, top hit putative homologs were selected and were similar to the APR gene sequence. Although the underlying mechanism of APR genes on the prolonged resistance is yet to be understood, elite wheat varieties that were developed by stacking R genes and APR genes such as *Lr34* have provided prolonged resistance against leaf rust and powdery mildew in wheat [108]. Similarly, *Xa21* has provided resistance against leaf blight in rice [107], [108], and *Lr22a* and *Lr67* have provided resistance against leaf rust in wheat and barley [109]–[111]. *Lr67* is known to provide a multi-pathogen resistance [107], cannabis genes (LOC115707412 and LOC115722344) that are homologous to *Lr67* have strong sequence similarity to the homologs and were upregulated at all three-time points (Figure 4). Likewise, there were four genes (LOC115700659, LOC115720696, LOC115705243, and LOC115721787) that were homologous to *Lr34*; the latter two were upregulated > 5 log<sub>2</sub> fold change by 11 DPI. Homologues of *Lr34* have also been demonstrated to provide broad-spectrum resistance against leaf rust, stripe rust (*Yr18*), stem rust (*Sr57*), and powdery mildew (*pm38*) in wheat [112]–[115]. Although all the referenced homologs were from monocots, they

have strong sequence similarity thus the putative cannabis APR genes can potentially be suitable 652  
candidates for further functional validation and subsequently develop suitable biomarkers and 653  
investigate the defense mechanism in cannabis against PM causing pathogens. 654

### 3.14 Powdery Mildew and Bud Rot Related Genes 655

In the present study, there were 45 differentially expressed genes homologous to 14 unique 656  
genes that have previously been investigated for their resistance against powdery mildew and 657  
bud rot [25], [116]–[129] (Table S7). There were three putative genes (LOC115704207, 658  
LOC115719169, and LOC115725564) homologous to *AT3G21630* [chitin elicitor receptor kinase 1 659  
(*CERK1*)], all of which were consistently upregulated  $>3.0 \log_2$  fold by 11 DPI (Table S7). Earlier 660  
studies in *Arabidopsis* demonstrated that a mutation in *AT3G21630* impeded the activation of a ma- 661  
jority of chito oligosaccharides-responsive genes and led to higher vulnerability to biotrophic fun- 662  
gus (*G. ambrosiae*) and necrotrophic fungus (*A. brassicicola*) [122]. Likewise, the knockout mutants 663  
of the homolog could not respond to fungal MAMPs in plants and were highly susceptible to fun- 664  
gus [130]. When the mutants were complemented with their wildtype (WT) gene copy, plants 665  
were able to recover WT *CERK1* function and induced the production of ROS in response to the 666  
fungal chitin elicitor [130]. Another putative gene worth noting was LOC115719467, homologous 667  
to enhanced disease resistance 2, (*EDR2*). An earlier study in *Arabidopsis* demonstrated that the 668  
homolog negatively regulated defense mechanism that was induced by powdery mildew. When 669  
*edr2* mutants were challenged by fungal pathogen, tissue chlorosis followed by necrosis was ob- 670  
served; however, the cell death response was localized and did not spread beyond the inoculated 671  
points indicating that the disruption phenotype was favorable to gain resistance against biotrophic 672

fungus such as *G. ambrosiae*. Similarly, there were two genes (LOC115701063 and LOC115699540) 673  
homologous to *PMR5* (AT5G58600) in *Arabidopsis thaliana*, and both the genes were upregulated 674  
consistently by 11 DPI (Figure 5). In the earlier study, the mutant phenotype of the *pmr5* gene con- 675  
ferred resistance against powdery mildew caused by *G. ambrosiae* and *Erysiphe orontii* [131]. Addi- 676  
tionally, mutants carried an enriched pectin layer, and smaller cell size indicating defects in cell 677  
expansion. Moreover, double mutants of *pmr5* and *pmr6* demonstrated a strong reduction in cell 678  
size along with high induction of uronic acid indicating that the double mutant affected pectin 679  
composition in the cell [131]. Both the mutants were important in the host cell wall modification 680  
and for effective plant-fungal interactions. While the homologs of *CERK1*, *EDR2*, and *PMR4* in 681  
cannabis are yet to be functionally validated, overexpression of *CERK1*, and loss-of-function muta- 682  
tion of *EDR2*, and *PMR4* may potentially involve in cannabis and PM interaction and the genes 683  
are strong candidates for further investigation. 684

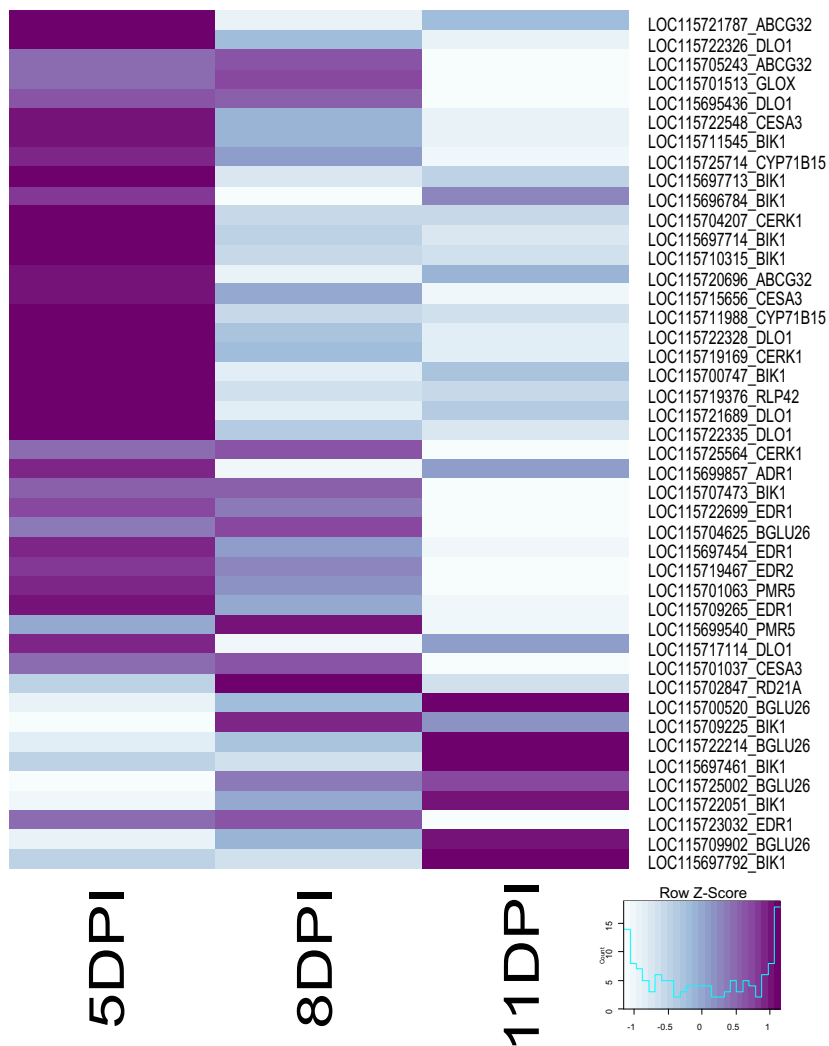

Figure 5. Heatmap showing the gene expression pattern of disease-specific genes in hemp through the course of time after the inoculation with *G. cichoracearum* infection. Putative genes that were shown in the heatmap were significantly differentially expressed at least at one time points ( $q < 0.05$ ). The ids starting with 'LOC11...' represent the gene ids corresponding to the original IDs in the reference genome [12]. Their corresponding gene sequences can be obtained from- [https://ftp.ncbi.nlm.nih.gov/genomes/all/annotation\\_releases/3483/100/GCF\\_900626175.1\\_cs10/](https://ftp.ncbi.nlm.nih.gov/genomes/all/annotation_releases/3483/100/GCF_900626175.1_cs10/). Dark purple indicate downregulated and light color indicates upregulation. Full length description of the annotation can be obtained in Table S7.

### 3.15 Mildew Resistance Locus (MLO)

Mildew Resistance Locus O (MLO) related genes, particularly loss-of-function mutants, are known to confer resistance against powdery mildew in several monocot and dicot plants, such as wheat [132], tomato [133], pea [134], and arabidopsis [135]. Recently, Mckernan et al [18] reported MLO genes in cannabis. In the current study, there were 16 MLO-related genes annotated as feronia receptor-like protein kinase, and all of them were consistently upregulated at all three-time points as the infection progressed to 11 DPI (Table S8). Mutants of *feronia* (*fer*) have been previously shown to increase resistance to PM [136]. In resistant genotypes, secretory vesicles attenuate pathogen penetration by reinforcing the cell wall, and this is usually associated with MLO mediated resistance [137]. However, normal MLO genes function as negative regulators of the secretory vesicle-associated defence system, thereby making a host susceptible to the PM fungus [138]. In the current study, many MLO related genes, including LOC115719491, LOC115702328, LOC115712737, and LOC115709196 showed  $\log_2$  fold change  $> 3.0$  in response to the pathogen and can be potential candidates for further functional validation using genome editing and investigate their potential role in mediating defence response against PM fungus.

## 4. Conclusions

To our knowledge, this is the first transcriptomic-wide report on hemp cultivar 'X59' - *G. americana* interaction. In recent years, the cannabis industry is rapidly growing, and breeders are shifting towards marker-assisted breeding, single nucleotide polymorphisms (SNP), and quantitative trait loci (QTL) mapping for improving agronomic properties for a multitude of applications including disease resistance. As a preliminary step towards elucidation of the molecular basis for

host and PM disease interaction, we have employed RNAseq and developed comprehensive transcriptome information. These results have contributed to a better understanding of the transcriptional changes involved in cannabis responses to the PM causative fungus and led to the identification of several key genes and metabolic pathways that are potentially involved in the host and the fungus interaction. It is supported by the upregulation of genes related to thaumatin, glycosyl hydrolases, phytoalexin, flavonoids, and phytohormones. SA-related genes particularly *PAD4*, and *EDS1* seem important in triggering host response to the pathogen, and glycosyl hydrolases particularly chitinases and glucanases involved in endo-hydrolysis of chitin molecules seem vital in responding against the pathogen. At the time of this investigation, neither PM-resistant cannabis genotypes nor real and near-isogenic lines for the cultivar of interest were available, precluding a comparison of gene expression in resistant versus susceptible plants. Despite this, our study has identified several genes that are important during PM disease development, including 45 genes that were potentially involved in fungal resistance against bud root and PM-related diseases and these genes will potentially be strong candidates for further validation of their biological role in mediating resistance response against the PM disease in cannabis. This study has opened avenues for further exploration of specific *Avr* genes in response to the pathogen, and other plant defence-related genes involved in the overall plant immunity. Additionally, some of the putative genes especially with high upregulation or downregulation expression values are still unannotated, thus they require further evaluation and characterization using overexpression and knockout mutants and elucidate their biological role. The transcriptome information developed in this study will also be a valuable resource for annotating the cannabis genome, which is still developing. Nevertheless, there is still a need for omics information on the host-pathogen interaction

developed from real isogenic or near-isogenic lines, which would potentially make a better com- 739

parison, especially when targeting specific pathogen response genes. 740

741

742

743

744

745

746

747

748

749

750

751

752

753

754

755

756

757

758

759

760

761

762

763

764

765

766

767

768

769

770

771

772

773

774

775

776

777

778

779

780

781

## References

1. Punja, Z. K.; Collyer, D.; Scott, C.; Lung, S.; Holmes, J.; Sutton, D. Pathogens and Molds Affecting Production and Quality of Cannabis Sativa L. *Front. Plant Sci.* **2019**, *10*, 1120. <https://doi.org/10.3389/fpls.2019.01120>.
2. Lebeda, A.; Mieslerová, B. Taxonomy, Distribution and Biology of Lettuce Powdery Mildew (Golovinomyces Cichoracearum Sensu Stricto): Lettuce Powdery Mildew. *Plant Pathology* **2011**, *60* (3), 400–415. <https://doi.org/10.1111/j.1365-3059.2010.02399.x>.
3. Magyarosy, A. C.; Schürmann, P.; Buchanan, B. B. Effect of Powdery Mildew Infection on Photosynthesis by Leaves and Chloroplasts of Sugar Beets. *Plant Physiol.* **1976**, *57* (4), 486–489. <https://doi.org/10.1104/pp.57.4.486>.
4. Gadoury, D. M.; Seem, R. C.; Pearson, R. C.; Wilcox, W. F.; Dunst, R. M. Effects of Powdery Mildew on Vine Growth, Yield, and Quality of Concord Grapes. *Plant Disease* **2001**, *85* (2), 137–140. <https://doi.org/10.1094/PDIS.2001.85.2.137>.
5. Gaunt, R. E. The Relationship Between Plant Disease Severity and Yield. 26.
6. Pfeufer, E.; Gauthier, N. W.; Bradley, C. A. Extension Plant Pathologists. 4.
7. Gilbert, A. N.; DiVerdi, J. A. Consumer Perceptions of Strain Differences in Cannabis Aroma. *PLoS ONE* **2018**, *13* (2), e0192247. <https://doi.org/10.1371/journal.pone.0192247>.
8. Punja, Z. K. Flower and Foliage-Infecting Pathogens of Marijuana ( *Cannabis Sativa* L.) Plants. *Canadian Journal of Plant Pathology* **2018**, *40* (4), 514–527. <https://doi.org/10.1080/07060661.2018.1535467>.
9. Yang, X.; Yang, L.; Wang, S.; Yu, D.; Ni, H. Synergistic Interaction of Physcion and Chrysophanol on Plant Powdery Mildew. *Pest. Manag. Sci.* **2007**, *63* (5), 511–515. <https://doi.org/10.1002/ps.1362>.
10. van Bakel, H.; Stout, J. M.; Cote, A. G.; Tallon, C. M.; Sharpe, A. G.; Hughes, T. R.; Page, J. E. The Draft Genome and Transcriptome of Cannabis Sativa. *Genome Biol* **2011**, *12* (10), R102. <https://doi.org/10.1186/gb-2011-12-10-r102>.
11. Braich, S.; Baillie, R. C.; Jewell, L. S.; Spangenberg, G. C.; Cogan, N. O. I. Generation of a Comprehensive Transcriptome Atlas and Transcriptome Dynamics in Medicinal Cannabis. *Sci Rep* **2019**, *9* (1), 16583. <https://doi.org/10.1038/s41598-019-53023-6>.
12. Grassa, C. J.; Wenger, J. P.; Dabney, C.; Poplawski, S. G.; Motley, S. T.; Michael, T. P.; Schwartz, C. J.; Weiblen, G. D. *A Complete Cannabis Chromosome Assembly and Adaptive Admixture for Elevated Cannabidiol (CBD) Content*; preprint; Genomics, 2018. <https://doi.org/10.1101/458083>.
13. Lavery, K. U.; Stout, J. M.; Sullivan, M. J.; Shah, H.; Gill, N.; Holbrook, L.; Deikus, G.; Sebra, R.; Hughes, T. R.; Page, J. E.; van Bakel, H. A Physical and Genetic Map of *Cannabis Sativa* Identifies Extensive Rearrangements at the *THC/CBD Acid Synthase* Loci. *Genome Res.* **2019**, *29* (1), 146–156. <https://doi.org/10.1101/gr.242594.118>.
14. Livingston, S. J.; Quilichini, T. D.; Booth, J. K.; Wong, D. C. J.; Rensing, K. H.; Laflamme-Yonkman, J.; Castellarin, S. D.; Bohlmann, J.; Page, J. E.; Samuels, A. L. Cannabis Glandular Trichomes Alter Morphology and Metabolite Content during Flower Maturation. *Plant J* **2020**, *101* (1), 37–56. <https://doi.org/10.1111/tpj.14516>.
15. Zager, J. J.; Lange, I.; Srividya, N.; Smith, A.; Lange, B. M. Gene Networks Underlying Cannabinoid and Terpenoid Accumulation in Cannabis. *Plant Physiol.* **2019**, *180* (4), 1877–1897. <https://doi.org/10.1104/pp.18.01506>.



16. Gao, C.; Cheng, C.; Zhao, L.; Yu, Y.; Tang, Q.; Xin, P.; Liu, T.; Yan, Z.; Guo, Y.; Zang, G. Genome-Wide Expression Profiles of Hemp (*Cannabis Sativa* L.) in Response to Drought Stress. *International Journal of Genomics* **2018**, *2018*, 1–13. <https://doi.org/10.1155/2018/3057272>. 825  
826  
827
17. Liu, J.; Qiao, Q.; Cheng, X.; Du, G.; Deng, G.; Zhao, M.; Liu, F. Transcriptome Differences between Fiber-Type and Seed-Type Cannabis Sativa Variety Exposed to Salinity. *Physiol Mol Biol Plants* **2016**, *22* (4), 429–443. <https://doi.org/10.1007/s12298-016-0381-z>. 828  
829  
830
18. McKernan, K. J.; Helbert, Y.; Kane, L. T.; Ebling, H.; Zhang, L.; Eaton, Z.; McLaughlin, S.; Kingan, S.; Baybayan, P.; Jordan, M.; Riva, A.; Barbazuk, W.; Harkins, T. Sequence and Annotation of 42 Cannabis Genomes Reveals Extensive Copy Number Variation in Cannabinoid Synthesis and Pathogen Resistance Genes. 56. 831  
832  
833  
834
19. Bustin, S. A.; Benes, V.; Garson, J. A.; Hellemans, J.; Huggett, J.; Kubista, M.; Mueller, R.; Nolan, T.; Pfaffl, M. W.; Shipley, G. L.; Vandesompele, J.; Wittwer, C. T. The MIQE Guidelines: Minimum Information for Publication of Quantitative Real-Time PCR Experiments. *Clinical Chemistry* **2009**, *55* (4), 611–622. <https://doi.org/10.1373/clinchem.2008.112797>. 835  
836  
837  
838
20. Trapnell, C.; Roberts, A.; Goff, L.; Pertea, G.; Kim, D.; Kelley, D. R.; Pimentel, H.; Salzberg, S. L.; Rinn, J. L.; Pachter, L. Differential Gene and Transcript Expression Analysis of RNA-Seq Experiments with TopHat and Cufflinks. *Nat Protoc* **2012**, *7* (3), 562–578. <https://doi.org/10.1038/nprot.2012.016>. 839  
840  
841
21. Langmead, B.; Salzberg, S. L. Fast Gapped-Read Alignment with Bowtie 2. *Nat Methods* **2012**, *9* (4), 357–359. <https://doi.org/10.1038/nmeth.1923>. 842  
843
22. Kim, D.; Pertea, G.; Trapnell, C.; Pimentel, H.; Kelley, R.; Salzberg, S. L. TopHat2: Accurate Alignment of Transcriptomes in the Presence of Insertions, Deletions and Gene Fusions. *Genome Biol* **2013**, *14* (4), R36. <https://doi.org/10.1186/gb-2013-14-4-r36>. 844  
845  
846
23. Benjamini, Y.; Hochberg, Y. Controlling the False Discovery Rate: A Practical and Powerful Approach to Multiple Testing. *Journal of the Royal Statistical Society: Series B (Methodological)* **1995**, *57* (1), 289–300. <https://doi.org/10.1111/j.2517-6161.1995.tb02031.x>. 847  
848  
849
24. Adal, A. M.; Doshi, K.; Holbrook, L.; Mahmoud, S. S. Comparative RNA-Seq Analysis Reveals Genes Associated with Masculinization in Female Cannabis Sativa. *Planta* **2021**, *253* (1), 17. <https://doi.org/10.1007/s00425-020-03522-y>. 850  
851  
852
25. Altschul, S. Gapped BLAST and PSI-BLAST: A New Generation of Protein Database Search Programs. *Nucleic Acids Research* **1997**, *25* (17), 3389–3402. <https://doi.org/10.1093/nar/25.17.3389>. 853  
854
26. Du, Z.; Zhou, X.; Ling, Y.; Zhang, Z.; Su, Z. AgriGO: A GO Analysis Toolkit for the Agricultural Community. *Nucleic Acids Research* **2010**, *38* (suppl\_2), W64–W70. <https://doi.org/10.1093/nar/gkq310>. 855  
856  
857
27. Robb, J.; Busch, L.; Brisson, J. D.; Lu, B. C. Ultrastructure of Wilt Syndrome Caused by *Verticillium Dahliae* . II. In Sunflower Leaves. *Can. J. Bot.* **1975**, *53* (23), 2725–2739. <https://doi.org/10.1139/b75-301>. 858  
859  
860
28. Vanacker, H.; Carver, T. L. W.; Foyer, C. H. Early H<sub>2</sub>O<sub>2</sub> Accumulation in Mesophyll Cells Leads to Induction of Glutathione during the Hyper-Sensitive Response in the Barley-Powdery Mildew Interaction. *Plant Physiology* **2000**, *123* (4), 1289–1300. <https://doi.org/10.1104/pp.123.4.1289>. 861  
862  
863
29. Foyer, C. H.; Descourvieres, P.; Kunert, K. J. Protection against Oxygen Radicals: An Important Defence Mechanism Studied in Transgenic Plants. *Plant Cell Environ* **1994**, *17* (5), 507–523. <https://doi.org/10.1111/j.1365-3040.1994.tb00146.x>. 864  
865  
866

- 
30. Galindo-González, L.; Manolii, V.; Hwang, S.-F.; Strelkov, S. E. Response of Brassica Napus to Plasmodiophora Brassicae Involves Salicylic Acid-Mediated Immunity: An RNA-Seq-Based Study. *Front. Plant Sci.* **2020**, *11*, 1025. <https://doi.org/10.3389/fpls.2020.01025>. 867  
868  
869
31. Rudd, J. J.; Kanyuka, K.; Hassani-Pak, K.; Derbyshire, M.; Andongabo, A.; Devonshire, J.; Lysenko, A.; Saqi, M.; Desai, N. M.; Powers, S. J.; Hooper, J.; Ambroso, L.; Bharti, A.; Farmer, A.; Hammond-Kosack, K. E.; Dietrich, R. A.; Courbot, M. Transcriptome and Metabolite Profiling of the Infection Cycle of *Zymoseptoria Tritici* on Wheat Reveals a Biphasic Interaction with Plant Immunity Involving Differential Pathogen Chromosomal Contributions and a Variation on the Hemibiotrophic Lifestyle Definition. *Plant Physiology* **2015**, *167* (3), 1158–1185. <https://doi.org/10.1104/pp.114.255927>. 870  
871  
872  
873  
874  
875
32. Han, X.; Kahmann, R. Manipulation of Phytohormone Pathways by Effectors of Filamentous Plant Pathogens. *Front. Plant Sci.* **2019**, *10*, 822. <https://doi.org/10.3389/fpls.2019.00822>. 876  
877
33. Dangl, J. L.; Jones, J. D. G. Plant Pathogens and Integrated Defence Responses to Infection. *Nature* **2001**, *411* (6839), 826–833. <https://doi.org/10.1038/35081161>. 878  
879
34. Asai, T.; Tena, G.; Plotnikova, J.; Willmann, M. R.; Chiu, W.-L.; Gomez-Gomez, L.; Boller, T.; Ausubel, F. M.; Sheen, J. MAP Kinase Signalling Cascade in Arabidopsis Innate Immunity. *Nature* **2002**, *415* (6875), 977–983. <https://doi.org/10.1038/415977a>. 880  
881  
882
35. Martin, G. B.; Bogdanove, A. J.; Sessa, G. Understanding the Functions of Plant Disease Resistance Proteins. *Annu. Rev. Plant Biol.* **2003**, *54* (1), 23–61. 883  
<https://doi.org/10.1146/annurev.arplant.54.031902.135035>. 885
36. van Ooijen, G.; van den Burg, H. A.; Cornelissen, B. J. C.; Takken, F. L. W. Structure and Function of Resistance Proteins in Solanaceous Plants. *Annu. Rev. Phytopathol.* **2007**, *45* (1), 43–72. 886  
<https://doi.org/10.1146/annurev.phyto.45.062806.094430>. 888
37. Yu, J.; Tehrim, S.; Zhang, F.; Tong, C.; Huang, J.; Cheng, X.; Dong, C.; Zhou, Y.; Qin, R.; Hua, W.; Liu, S. Genome-Wide Comparative Analysis of NBS-Encoding Genes between Brassica Species and Arabidopsis Thaliana. *BMC Genomics* **2014**, *15* (1), 3. <https://doi.org/10.1186/1471-2164-15-3>. 889  
890  
891
38. Song, X.; Li, Y.; Cao, X.; Qi, Y. MicroRNAs and Their Regulatory Roles in Plant–Environment Interactions. *Annu. Rev. Plant Biol.* **2019**, *70* (1), 489–525. <https://doi.org/10.1146/annurev-arplant-050718-100334>. 892  
893  
894
39. Galindo-González, L.; Deyholos, M. K. RNA-Seq Transcriptome Response of Flax (*Linum Usitatissimum* L.) to the Pathogenic Fungus *Fusarium Oxysporum* f. Sp. Lini. *Front. Plant Sci.* **2016**, *7*. <https://doi.org/10.3389/fpls.2016.01766>. 895  
896  
897
40. Bittner-Eddy, P. D.; Crute, I. R.; Holub, E. B.; Beynon, J. L. RPP13 Is a Simple Locus in Arabidopsis Thaliana for Alleles That Specify Downy Mildew Resistance to Different Avirulence Determinants in *Peronospora Parasitica*. *Plant J* **2000**, *21* (2), 177–188. <https://doi.org/10.1046/j.1365-313x.2000.00664.x>. 898  
899  
900  
901
41. Ramonell, K.; Berrocal-Lobo, M.; Koh, S.; Wan, J.; Edwards, H.; Stacey, G.; Somerville, S. Loss-of-Function Mutations in Chitin Responsive Genes Show Increased Susceptibility to the Powdery Mildew Pathogen *Erysiphe Cichoracearum*. *Plant Physiology* **2005**, *138* (2), 1027–1036. 902  
903  
904  
<https://doi.org/10.1104/pp.105.060947>. 905
42. Seto, D.; Koulana, N.; Lo, T.; Menna, A.; Guttman, D. S.; Desveaux, D. Expanded Type III Effector Recognition by the ZAR1 NLR Protein Using ZED1-Related Kinases. *Nature Plants* **2017**, *3* (4), 17027. 906  
<https://doi.org/10.1038/nplants.2017.27>. 907  
908

43. Wang, J.; Hu, M.; Wang, J.; Qi, J.; Han, Z.; Wang, G.; Qi, Y.; Wang, H.-W.; Zhou, J.-M.; Chai, J. Reconstitution and Structure of a Plant NLR Resistor Conferring Immunity. *Science* **2019**, *364* (6435), eaav5870. <https://doi.org/10.1126/science.aav5870>. 909  
910  
911
44. Mundt, C. C. Pyramiding for Resistance Durability: Theory and Practice. *Phytopathology*<sup>®</sup> **2018**, *108* (7), 792–802. <https://doi.org/10.1094/PHTO-12-17-0426-RVW>. 912  
913
45. Mafu, S.; Ding, Y.; Murphy, K. M.; Yaacoobi, O.; Addison, J. B.; Wang, Q.; Shen, Z.; Briggs, S. P.; Bohlmann, J.; Castro-Falcon, G.; Hughes, C. C.; Betsiashvili, M.; Huffaker, A.; Schmelz, E. A.; Zerbe, P. Discovery, Biosynthesis and Stress-Related Accumulation of Dolabradiene-Derived Defenses in Maize. *Plant Physiol.* **2018**, *176* (4), 2677–2690. <https://doi.org/10.1104/pp.17.01351>. 914  
915  
916  
917
46. Meng, X.; Zhang, S. MAPK Cascades in Plant Disease Resistance Signaling. *Annu. Rev. Phytopathol.* **2013**, *51* (1), 245–266. <https://doi.org/10.1146/annurev-phyto-082712-102314>. 918  
919
47. Shimura, K.; Okada, A.; Okada, K.; Jikumaru, Y.; Ko, K.-W.; Toyomasu, T.; Sassa, T.; Hasegawa, M.; Kodama, O.; Shibuya, N.; Koga, J.; Nojiri, H.; Yamane, H. Identification of a Biosynthetic Gene Cluster in Rice for Momilactones. *Journal of Biological Chemistry* **2007**, *282* (47), 34013–34018. <https://doi.org/10.1074/jbc.M703344200>. 920  
921  
922  
923
48. Weldon, W. A.; Ullrich, M. R.; Smart, L. B.; Smart, C. D.; Gadoury, D. M. Cross-Infectivity of Powdery Mildew Isolates Originating from Hemp ( *Cannabis Sativa* ) and Japanese Hop ( *Humulus Japonicus* ) in New York. *Plant Health Progress* **2020**, *21* (1), 47–53. <https://doi.org/10.1094/PHP-09-19-0067-RS>. 924  
925  
926  
927
49. Taj, G.; Agarwal, P.; Grant, M.; Kumar, A. MAPK Machinery in Plants: Recognition and Response to Different Stresses through Multiple Signal Transduction Pathways. *Plant Signaling & Behavior* **2010**, *5* (11), 1370–1378. <https://doi.org/10.4161/psb.5.11.13020>. 928  
929  
930
50. Frye, C. A.; Innes, R. W. An Arabidopsis Mutant with Enhanced Resistance to Powdery Mildew. 11. 931
51. Frye, C. A.; Tang, D.; Innes, R. W. Negative Regulation of Defense Responses in Plants by a Conserved MAPKK Kinase. *Proceedings of the National Academy of Sciences* **2001**, *98* (1), 373–378. <https://doi.org/10.1073/pnas.98.1.373>. 932  
933  
934
52. Tang, D.; Innes, R. W. Overexpression of a Kinase-Deficient Form of the *EDR1* Gene Enhances Powdery Mildew Resistance and Ethylene-Induced Senescence in *Arabidopsis*: Engineering Powdery Mildew Resistance. *The Plant Journal* **2002**, *32* (6), 975–983. <https://doi.org/10.1046/j.1365-313X.2002.01482.x>. 935  
936  
937  
938
53. Ren, D.; Liu, Y.; Yang, K.-Y.; Han, L.; Mao, G.; Glazebrook, J.; Zhang, S. A Fungal-Responsive MAPK Cascade Regulates Phytoalexin Biosynthesis in Arabidopsis. *Proceedings of the National Academy of Sciences* **2008**, *105* (14), 5638–5643. <https://doi.org/10.1073/pnas.0711301105>. 939  
940  
941
54. Gordân, R.; Murphy, K. F.; McCord, R. P.; Zhu, C.; Vedenko, A.; Bulyk, M. L. Curated Collection of Yeast Transcription Factor DNA Binding Specificity Data Reveals Novel Structural and Gene Regulatory Insights. *Genome Biol* **2011**, *12* (12), R125. <https://doi.org/10.1186/gb-2011-12-12-r125>. 942  
943  
944
55. Kidd, B. N.; Kadoo, N. Y.; Dombrecht, B.; Tekeoglu, M.; Gardiner, D. M.; Thatcher, L. F.; Aitken, E. A. B.; Schenk, P. M.; Manners, J. M.; Kazan, K. Auxin Signaling and Transport Promote Susceptibility to the Root-Infecting Fungal Pathogen *Fusarium Oxysporum* in *Arabidopsis*. *MPMI* **2011**, *24* (6), 733–748. <https://doi.org/10.1094/MPMI-08-10-0194>. 945  
946  
947  
948
56. Widemann, E.; Miesch, L.; Lugan, R.; Holder, E.; Heinrich, C.; Aubert, Y.; Miesch, M.; Pinot, F.; Heitz, T. The Amidohydrolases IAR3 and ILL6 Contribute to Jasmonoyl-Isoleucine Hormone Turnover and 949  
950

- Generate 12-Hydroxyjasmonic Acid Upon Wounding in Arabidopsis Leaves. *Journal of Biological Chemistry* **2013**, *288* (44), 31701–31714. <https://doi.org/10.1074/jbc.M113.499228>. 951  
952
57. Wei, K.; Chen, J.; Wang, Y.; Chen, Y.; Chen, S.; Lin, Y.; Pan, S.; Zhong, X.; Xie, D. Genome-Wide Analysis of BZIP-Encoding Genes in Maize. *DNA Research* **2012**, *19* (6), 463–476. 953  
<https://doi.org/10.1093/dnares/dss026>. 955
58. Brand, L. H.; Fischer, N. M.; Harter, K.; Kohlbacher, O.; Wanke, D. Elucidating the Evolutionary Conserved DNA-Binding Specificities of WRKY Transcription Factors by Molecular Dynamics and in Vitro Binding Assays. *Nucleic Acids Research* **2013**, *41* (21), 9764–9778. 956  
<https://doi.org/10.1093/nar/gkt732>. 957  
958  
959
59. Lippok, B.; Birkenbihl, R. P.; Rivory, G.; Brümmer, J.; Schmelzer, E.; Logemann, E.; Somssich, I. E. Expression of *AtWRKY33* Encoding a Pathogen- or PAMP-Responsive WRKY Transcription Factor Is Regulated by a Composite DNA Motif Containing W Box Elements. *MPMI* **2007**, *20* (4), 420–429. 960  
<https://doi.org/10.1094/MPMI-20-4-0420>. 963
60. Ng, D.; Abeysinghe, J.; Kamali, M. Regulating the Regulators: The Control of Transcription Factors in Plant Defense Signaling. *IJMS* **2018**, *19* (12), 3737. <https://doi.org/10.3390/ijms19123737>. 964  
965
61. Hu, Y.; Dong, Q.; Yu, D. Arabidopsis WRKY46 Coordinates with WRKY70 and WRKY53 in Basal Resistance against Pathogen *Pseudomonas Syringae*. *Plant Science* **2012**, *185–186*, 288–297. 966  
<https://doi.org/10.1016/j.plantsci.2011.12.003>. 968
62. Van Eck, L.; Davidson, R. M.; Wu, S.; Zhao, B. Y.; Botha, A.-M.; Leach, J. E.; Lapitan, N. L. V. The Transcriptional Network of WRKY53 in Cereals Links Oxidative Responses to Biotic and Abiotic Stress Inputs. *Funct Integr Genomics* **2014**, *14* (2), 351–362. <https://doi.org/10.1007/s10142-014-0374-3>. 969  
970  
971  
972
63. Marcel, S.; Sawers, R.; Oakeley, E.; Angliker, H.; Paszkowski, U. Tissue-Adapted Invasion Strategies of the Rice Blast Fungus *Magnaporthe Oryzae*. *The Plant Cell* **2010**, *22* (9), 3177–3187. 973  
<https://doi.org/10.1105/tpc.110.078048>. 975
64. Kim, S. H.; Lam, P. Y.; Lee, M.-H.; Jeon, H. S.; Tobimatsu, Y.; Park, O. K. The Arabidopsis R2R3 MYB Transcription Factor MYB15 Is a Key Regulator of Lignin Biosynthesis in Effector-Triggered Immunity. *Front. Plant Sci.* **2020**, *11*, 583153. <https://doi.org/10.3389/fpls.2020.583153>. 976  
977  
978
65. Sung Shim, J.; Do Choi, Y. Direct Regulation of *WRKY70* by *AtMYB44* in Plant Defense Responses. *Plant Signaling & Behavior* **2013**, *8* (6), e24509. <https://doi.org/10.4161/psb.24509>. 979  
980
66. Ramírez, V.; Agorio, A.; Coego, A.; García-Andrade, J.; Hernández, M. J.; Balaguer, B.; Ouwkerk, P. B. F.; Zarra, I.; Vera, P. MYB46 Modulates Disease Susceptibility to *Botrytis Cinerea* in Arabidopsis. *Plant Physiology* **2011**, *155* (4), 1920–1935. <https://doi.org/10.1104/pp.110.171843>. 981  
982  
983
67. Kim, K.-C.; Fan, B.; Chen, Z. Pathogen-Induced Arabidopsis WRKY7 Is a Transcriptional Repressor and Enhances Plant Susceptibility to *Pseudomonas Syringae*. *Plant Physiology* **2006**, *142* (3), 1180–1192. 984  
<https://doi.org/10.1104/pp.106.082487>. 986
68. Yuan, X.; Wang, H.; Cai, J.; Li, D.; Song, F. NAC Transcription Factors in Plant Immunity. *Phytopathol Res* **2019**, *1* (1), 3. <https://doi.org/10.1186/s42483-018-0008-0>. 987  
988
69. Zhang, N.; Hecht, C.; Sun, X.; Fei, Z.; Martin, G. B. Loss of Function of BHLH Transcription Factor *Nrd1* in Tomato Induces an Arabinogalactan Protein-Encoding Gene and Enhances Resistance to *Pseudomonas Syringae* Pv. Tomato; preprint; Plant Biology, 2021. 989  
<https://doi.org/10.1101/2021.11.08.467746>. 991  
992

- 
70. Bian, Z.; Gao, H.; Wang, C. NAC Transcription Factors as Positive or Negative Regulators during Ongoing Battle between Pathogens and Our Food Crops. *IJMS* **2020**, *22* (1), 81. <https://doi.org/10.3390/ijms22010081>. 993  
994  
995
71. Nakashima, K.; Tran, L.-S. P.; Van Nguyen, D.; Fujita, M.; Maruyama, K.; Todaka, D.; Ito, Y.; Hayashi, N.; Shinozaki, K.; Yamaguchi-Shinozaki, K. Functional Analysis of a NAC-Type Transcription Factor OsNAC6 Involved in Abiotic and Biotic Stress-Responsive Gene Expression in Rice: Rice OsNAC6 Functions in Stress Responses. *The Plant Journal* **2007**, *51* (4), 617–630. <https://doi.org/10.1111/j.1365-313X.2007.03168.x>. 996  
997  
998  
999  
1000
72. Yokotani, N.; Tsuchida-Mayama, T.; Ichikawa, H.; Mitsuda, N.; Ohme-Takagi, M.; Kaku, H.; Minami, E.; Nishizawa, Y. OsNAC111, a Blast Disease-Responsive Transcription Factor in Rice, Positively Regulates the Expression of Defense-Related Genes. *MPMI* **2014**, *27* (10), 1027–1034. <https://doi.org/10.1094/MPMI-03-14-0065-R>. 1001  
1002  
1003  
1004
73. Sun, L.; Zhang, H.; Li, D.; Huang, L.; Hong, Y.; Ding, X. S.; Nelson, R. S.; Zhou, X.; Song, F. Functions of Rice NAC Transcriptional Factors, ONAC122 and ONAC131, in Defense Responses against Magnaporthe Grisea. *Plant Mol Biol* **2013**, *81* (1–2), 41–56. <https://doi.org/10.1007/s11103-012-9981-3>. 1005  
1006  
1007  
1008
74. Meisrimler, C.; Pelgrom, A. J. E.; Oud, B.; Out, S.; Van den Ackerveken, G. Multiple Downy Mildew Effectors Target the Stress-related NAC Transcription Factor Ls NAC 069 in Lettuce. *Plant J* **2019**, *99* (6), 1098–1115. <https://doi.org/10.1111/tpj.14383>. 1009  
1010  
1011
75. Wink, M. Evolution of Secondary Metabolites from an Ecological and Molecular Phylogenetic Perspective. *Phytochemistry* **2003**, *64* (1), 3–19. [https://doi.org/10.1016/S0031-9422\(03\)00300-5](https://doi.org/10.1016/S0031-9422(03)00300-5). 1012  
1013
76. Pusztahelyi, T.; Holb, I. J.; P<sup>3</sup>csi, I. Secondary Metabolites in Fungus-Plant Interactions. *Front. Plant Sci.* **2015**, *6*. <https://doi.org/10.3389/fpls.2015.00573>. 1014  
1015
77. Rao, A.; Zhang, Y.; Muend, S.; Rao, R. Mechanism of Antifungal Activity of Terpenoid Phenols Resembles Calcium Stress and Inhibition of the TOR Pathway. *Antimicrob Agents Chemother* **2010**, *54* (12), 5062–5069. <https://doi.org/10.1128/AAC.01050-10>. 1016  
1017  
1018
78. Karas, J. A.; Wong, L. J. M.; Paulin, O. K. A.; Mazeh, A. C.; Hussein, M. H.; Li, J.; Velkov, T. The Antimicrobial Activity of Cannabinoids. *Antibiotics* **2020**, *9* (7), 406. <https://doi.org/10.3390/antibiotics9070406>. 1019  
1020  
1021
79. Singh, K.; Rani, A.; Kumar, S.; Sood, P.; Mahajan, M.; Yadav, S. K.; Singh, B.; Ahuja, P. S. An Early Gene of the Flavonoid Pathway, Flavanone 3-Hydroxylase, Exhibits a Positive Relationship with the Concentration of Catechins in Tea (*Camellia Sinensis*). *Tree Physiology* **2008**, *28* (9), 1349–1356. <https://doi.org/10.1093/treephys/28.9.1349>. 1022  
1023  
1024  
1025
80. Hammerbacher, A.; Kandasamy, D.; Ullah, C.; Schmidt, A.; Wright, L. P.; Gershenzon, J. Flavanone-3-Hydroxylase Plays an Important Role in the Biosynthesis of Spruce Phenolic Defenses Against Bark Beetles and Their Fungal Associates. *Front. Plant Sci.* **2019**, *10*, 208. <https://doi.org/10.3389/fpls.2019.00208>. 1026  
1027  
1028  
1029
81. Chen, X.; Chen, H.; Yuan, J. S.; Köllner, T. G.; Chen, Y.; Guo, Y.; Zhuang, X.; Chen, X.; Zhang, Y.; Fu, J.; Nebenführ, A.; Guo, Z.; Chen, F. The Rice Terpene Synthase Gene *OstPS19* Functions as an (S)-Limonene Synthase in *Planta*, and Its Overexpression Leads to Enhanced Resistance to the Blast Fungus *Magnaporthe Oryzae*. *Plant Biotechnol J* **2018**, *16* (10), 1778–1787. <https://doi.org/10.1111/pbi.12914>. 1030  
1031  
1032  
1033  
1034

82. Blaskovich, M. A. T.; Kavanagh, A. M.; Elliott, A. G.; Zhang, B.; Ramu, S.; Amado, M.; Lowe, G. J.; Hinton, A. O.; Pham, D. M. T.; Zuegg, J.; Beare, N.; Quach, D.; Sharp, M. D.; Pogliano, J.; Rogers, A. P.; Lyras, D.; Tan, L.; West, N. P.; Crawford, D. W.; Peterson, M. L.; Callahan, M.; Thurn, M. The Antimicrobial Potential of Cannabidiol. *Commun Biol* **2021**, *4* (1), 7. <https://doi.org/10.1038/s42003-020-01530-y>.
83. Fathordoobady, F.; Singh, A.; Kitts, D. D.; Pratap Singh, A. Hemp (*Cannabis Sativa* L.) Extract: Anti-Microbial Properties, Methods of Extraction, and Potential Oral Delivery. *Food Reviews International* **2019**, *35* (7), 664–684. <https://doi.org/10.1080/87559129.2019.1600539>.
84. Radwan, M. M.; ElSohly, M. A.; Slade, D.; Ahmed, S. A.; Khan, I. A.; Ross, S. A. Biologically Active Cannabinoids from High-Potency *Cannabis Sativa*. *J. Nat. Prod.* **2009**, *72* (5), 906–911. <https://doi.org/10.1021/np900067k>.
85. Jeandet, P. Phytoalexins: Current Progress and Future Prospects. *Molecules* **2015**, *20* (2), 2770–2774. <https://doi.org/10.3390/molecules20022770>.
86. Nafisi, M.; Goregaoker, S.; Botanga, C. J.; Glawischnig, E.; Olsen, C. E.; Halkier, B. A.; Glazebrook, J. *Arabidopsis* Cytochrome P450 Monooxygenase 71A13 Catalyzes the Conversion of Indole-3-Acetaldoxime in Camalexin Synthesis. *The Plant Cell* **2007**, *19* (6), 2039–2052. <https://doi.org/10.1105/tpc.107.051383>.
87. De Vos, M.; Van Oosten, V. R.; Van Poecke, R. M. P.; Van Pelt, J. A.; Pozo, M. J.; Mueller, M. J.; Buchala, A. J.; Métraux, J.-P.; Van Loon, L. C.; Dicke, M.; Pieterse, C. M. J. Signal Signature and Transcriptome Changes of *Arabidopsis* During Pathogen and Insect Attack. *MPMI* **2005**, *18* (9), 923–937. <https://doi.org/10.1094/MPMI-18-0923>.
88. Ma, K.-W.; Ma, W. Phytohormone Pathways as Targets of Pathogens to Facilitate Infection. *Plant Mol Biol* **2016**, *91* (6), 713–725. <https://doi.org/10.1007/s11103-016-0452-0>.
89. Wang, L.; Tsuda, K.; Sato, M.; Cohen, J. D.; Katagiri, F.; Glazebrook, J. *Arabidopsis* CaM Binding Protein CBP60g Contributes to MAMP-Induced SA Accumulation and Is Involved in Disease Resistance against *Pseudomonas Syringae*. *PLoS Pathog* **2009**, *5* (2), e1000301. <https://doi.org/10.1371/journal.ppat.1000301>.
90. Vlot, A. C.; Dempsey, D. A.; Klessig, D. F. Salicylic Acid, a Multifaceted Hormone to Combat Disease. *Annu. Rev. Phytopathol.* **2009**, *47* (1), 177–206. <https://doi.org/10.1146/annurev.phyto.050908.135202>.
91. Zeilmaker, T.; Ludwig, N. R.; Elberse, J.; Seidl, M. F.; Berke, L.; Van Doorn, A.; Schuurink, R. C.; Snel, B.; Van den Ackerveken, G. DOWNY MILDEW RESISTANT 6 and DMR6-LIKE OXYGENASE 1 Are Partially Redundant but Distinct Suppressors of Immunity in *Arabidopsis*. *Plant J* **2015**, *81* (2), 210–222. <https://doi.org/10.1111/tpj.12719>.
92. Feng, J.; Zhang, M.; Yang, K.-N.; Zheng, C.-X. Salicylic Acid-Primed Defence Response in Octoploid Strawberry ‘Benihoppe’ Leaves Induces Resistance against *Podosphaera Aphanis* through Enhanced Accumulation of Proanthocyanidins and Upregulation of Pathogenesis-Related Genes. *BMC Plant Biol* **2020**, *20* (1), 149. <https://doi.org/10.1186/s12870-020-02353-z>.
93. Zhao, Y.; Bi, K.; Gao, Z.; Chen, T.; Liu, H.; Xie, J.; Cheng, J.; Fu, Y.; Jiang, D. Transcriptome Analysis of *Arabidopsis Thaliana* in Response to *Plasmodiophora Brassicae* during Early Infection. *Front. Microbiol.* **2017**, *8*, 673. <https://doi.org/10.3389/fmicb.2017.00673>.

- 
94. Berrocal-Lobo, M.; Molina, A.; Solano, R. Constitutive Expression of *ETHYLENE-RESPONSE-FACTOR1* in *Arabidopsis* Confers Resistance to Several Necrotrophic Fungi. *The Plant Journal* **2002**, *29* (1), 23–32. <https://doi.org/10.1046/j.1365-313x.2002.01191.x>. 1076  
1077  
1078
95. Fujimoto, S. Y.; Ohta, M.; Usui, A.; Shinshi, H.; Ohme-Takagi, M. Arabidopsis Ethylene-Responsive Element Binding Factors Act as Transcriptional Activators or Repressors of GCC Box-Mediated Gene Expression. **2021**, 13. 1079  
1080  
1081
96. Dey, S.; Corina Vlot, A. Ethylene Responsive Factors in the Orchestration of Stress Responses in Monocotyledonous Plants. *Front. Plant Sci.* **2015**, *6*. <https://doi.org/10.3389/fpls.2015.00640>. 1082  
1083
97. Vijayan, P.; Shockey, J.; Levesque, C. A.; Cook, R. J.; Browse, J. A Role for Jasmonate in Pathogen Defense of Arabidopsis. *Proceedings of the National Academy of Sciences* **1998**, *95* (12), 7209–7214. <https://doi.org/10.1073/pnas.95.12.7209>. 1084  
1085  
1086
98. Kitaoka, N.; Matsubara, T.; Sato, M.; Takahashi, K.; Wakuta, S.; Kawaide, H.; Matsui, H.; Nabeta, K.; Matsuura, H. Arabidopsis CYP94B3 Encodes Jasmonyl-Isoleucine 12-Hydroxylase, a Key Enzyme in the Oxidative Catabolism of Jasmonate. *Plant and Cell Physiology* **2011**, *52* (10), 1757–1765. <https://doi.org/10.1093/pcp/pcr110>. 1087  
1088  
1089  
1090
99. Anguelova-Merhar, V. S. B-1,3-Glucanase and Chitinase Activities and the Resistance Response of Wheat to Leaf Rust. 6. 1091  
1092
100. de A. Gerhardt, L. B.; Sabetto-Martins, G.; Contarini, M. G.; Sandroni, M.; de P. Ferreira, R.; de Lima, V. M.; Cordeiro, M. C.; de Oliveira, D. E.; Margis-Pinheiro, M. Arabidopsis *Thaliana* Class IV Chitinase Is Early Induced during the Interaction with *Xanthomonas Campestris*. *FEBS Letters* **1997**, *419* (1), 69–75. [https://doi.org/10.1016/S0014-5793\(97\)01332-X](https://doi.org/10.1016/S0014-5793(97)01332-X). 1093  
1094  
1095  
1096
101. Su, Y.; Wang, Z.; Liu, F.; Li, Z.; Peng, Q.; Guo, J.; Xu, L.; Que, Y. Isolation and Characterization of ScGluD2, a New Sugarcane Beta-1,3-Glucanase D Family Gene Induced by Sporisorium Scitamineum, ABA, H<sub>2</sub>O<sub>2</sub>, NaCl, and CdCl<sub>2</sub> Stresses. *Front. Plant Sci.* **2016**, *7*. <https://doi.org/10.3389/fpls.2016.01348>. 1097  
1098  
1099  
1100  
1101
102. Hamamouch, N.; Li, C.; Hewezi, T.; Baum, T. J.; Mitchum, M. G.; Hussey, R. S.; Vodkin, L. O.; and Davis, E. L. The interaction of the novel 30C02 cyst nematode effector protein with a plant  $\beta$ -1,3-endoglucanase may suppress host defence to promote parasitism. *J. Exp. Bot.* **2011**, *63*(10), 3683–3695. <https://doi.org/10.1093/jxb/ers058> 1102  
1103  
1104  
1105  
1106
103. Andersen, E.; Ali, S.; Byamukama, E.; Yen, Y.; Nepal, M. Disease Resistance Mechanisms in Plants. *Genes* **2018**, *9* (7), 339. <https://doi.org/10.3390/genes9070339>. 1107  
1108
104. Hejgaard, J.; Jacobsen, S.; Svendsen, I. Two Antifungal Thaumatin-like Proteins from Barley Grain. *FEBS Letters* **1991**, *291* (1), 127–131. [https://doi.org/10.1016/0014-5793\(91\)81119-S](https://doi.org/10.1016/0014-5793(91)81119-S). 1109  
1110
105. Roberts, W. K.; Selitrennikoff, C. P. Zeamatin, an Antifungal Protein from Maize with Membrane-Permeabilizing Activity. *Journal of General Microbiology* **1990**, *136* (9), 1771–1778. <https://doi.org/10.1099/00221287-136-9-1771>. 1111  
1112  
1113
106. Wijaya, R.; Neumann, G. M.; Condrón, R.; Hughes, A. B.; Polya, G. M. Defense Proteins from Seed of *Cassia Fistula* Include a Lipid Transfer Protein Homologue and a Protease Inhibitory Plant Defensin. *Plant Science* **2000**, *159* (2), 243–255. [https://doi.org/10.1016/S0168-9452\(00\)00348-4](https://doi.org/10.1016/S0168-9452(00)00348-4). 1114  
1115  
1116
107. Ellis, J. G.; Lagudah, E. S.; Spielmeier, W.; Dodds, P. N. The Past, Present and Future of Breeding Rust Resistant Wheat. *Front. Plant Sci.* **2014**, *5*. <https://doi.org/10.3389/fpls.2014.00641>. 1117  
1118

108. Krattinger, S. G.; Lagudah, E. S.; Spielmeyer, W.; Singh, R. P.; Huerta-Espino, J.; McFadden, H.; Bossolini, E.; Selter, L. L.; Keller, B. A Putative ABC Transporter Confers Durable Resistance to Multiple Fungal Pathogens in Wheat. *Science* **2009**, *323* (5919), 1360–1363. <https://doi.org/10.1126/science.1166453>.
109. Century, K. S.; Lagman, R. A.; Adkisson, M.; Morlan, J.; Tobias, R.; Schwartz, K.; Smith, A.; Love, J.; Ronald, P. C.; Whalen, M. C. Developmental Control of Xa21-Mediated Disease Resistance in Rice: Developmental Disease Resistance in Rice. *The Plant Journal* **1999**, *20* (2), 231–236. <https://doi.org/10.1046/j.1365-313x.1999.00589.x>.
110. Moore, J. W.; Herrera-Foessel, S.; Lan, C.; Schnippenkoetter, W.; Ayliffe, M.; Huerta-Espino, J.; Lillemo, M.; Viccars, L.; Milne, R.; Periyannan, S.; Kong, X.; Spielmeyer, W.; Talbot, M.; Bariana, H.; Patrick, J. W.; Dodds, P.; Singh, R.; Lagudah, E. A Recently Evolved Hexose Transporter Variant Confers Resistance to Multiple Pathogens in Wheat. *Nat Genet* **2015**, *47* (12), 1494–1498. <https://doi.org/10.1038/ng.3439>.
111. Song, W.-Y.; Wang, G.-L.; Chen, L.-L.; Kim, H.-S.; Pi, L.-Y.; Holsten, T.; Gardner, J.; Wang, B.; Zhai, W.-X.; Zhu, L.-H.; Fauquet, C.; Ronald, P. A Receptor Kinase-Like Protein Encoded by the Rice Disease Resistance Gene, *Xa21*. *Science* **1995**, *270* (5243), 1804–1806. <https://doi.org/10.1126/science.270.5243.1804>.
112. Hiebert, C. W.; Thomas, J. B.; Somers, D. J.; McCallum, B. D.; Fox, S. L. Microsatellite Mapping of Adult-Plant Leaf Rust Resistance Gene *Lr22a* in Wheat. *Theor Appl Genet* **2007**, *115* (6), 877–884. <https://doi.org/10.1007/s00122-007-0604-3>.
113. Hulbert, S. H.; Bai, J.; Fellers, J. P.; Pacheco, M. G.; Bowden, R. L. Gene Expression Patterns in Near Isogenic Lines for Wheat Rust Resistance Gene *Lr34/Yr18*. *Phytopathology*® **2007**, *97* (9), 1083–1093. <https://doi.org/10.1094/PHYTO-97-9-1083>.
114. Lagudah, E. S.; McFadden, H.; Singh, R. P.; Huerta-Espino, J.; Bariana, H. S.; Spielmeyer, W. Molecular Genetic Characterization of the *Lr34/Yr18* Slow Rusting Resistance Gene Region in Wheat. *Theor Appl Genet* **2006**, *114* (1), 21–30. <https://doi.org/10.1007/s00122-006-0406-z>.
115. Milne, R. J.; Dibley, K. E.; Schnippenkoetter, W.; Mascher, M.; Lui, A. C. W.; Wang, L.; Lo, C.; Ashton, A. R.; Ryan, P. R.; Lagudah, E. S. The Wheat *Lr67* Gene from the Sugar Transport Protein 13 Family Confers Multipathogen Resistance in Barley. *Plant Physiol.* **2019**, *179* (4), 1285–1297. <https://doi.org/10.1104/pp.18.00945>.
116. Ferrari, S.; Plotnikova, J. M.; De Lorenzo, G.; Ausubel, F. M. *Arabidopsis* Local Resistance to *Botrytis Cinerea* Involves Salicylic Acid and Camalexin and Requires *EDS4* and *PAD2*, but Not *SID2*, *EDS5* or *PAD4*: Local *Arabidopsis* Response to *Botrytis*. *The Plant Journal* **2003**, *35* (2), 193–205. <https://doi.org/10.1046/j.1365-313X.2003.01794.x>.
117. Grant, J. J.; Chini, A.; Basu, D.; Loake, G. J. Targeted Activation Tagging of the *Arabidopsis* *NBS-LRR* Gene, *ADR1*, Conveys Resistance to Virulent Pathogens. *MPMI* **2003**, *16* (8), 669–680. <https://doi.org/10.1094/MPMI.2003.16.8.669>.
118. Nishimura, M. T.; Stein, M.; Hou, B.-H.; Vogel, J. P.; Edwards, H.; Somerville, S. C. Loss of a Callose Synthase Results in Salicylic Acid-Dependent Disease Resistance. *Science* **2003**, *301* (5635), 969–972. <https://doi.org/10.1126/science.1086716>.
119. Tang, D.; Ade, J.; Frye, C. A.; Innes, R. W. Regulation of Plant Defense Responses in *Arabidopsis* by EDR2, a PH and START Domain-Containing Protein: Regulation of Plant Defenses by EDR2. *The Plant Journal* **2005**, *44* (2), 245–257. <https://doi.org/10.1111/j.1365-313X.2005.02523.x>.



120. Veronese, P.; Nakagami, H.; Bluhm, B.; AbuQamar, S.; Chen, X.; Salmeron, J.; Dietrich, R. A.; Hirt, H.; Mengiste, T. The Membrane-Anchored *BOTRYTIS-INDUCED KINASE1* Plays Distinct Roles in *Arabidopsis* Resistance to Necrotrophic and Biotrophic Pathogens. *The Plant Cell* **2005**, *18* (1), 257–273. <https://doi.org/10.1105/tpc.105.035576>.
121. Vorwerk, S.; Schiff, C.; Santamaria, M.; Koh, S.; Nishimura, M.; Vogel, J.; Somerville, C.; Somerville, S. EDR2 Negatively Regulates Salicylic Acid-Based Defenses and Cell Death during Powdery Mildew Infections of *Arabidopsis Thaliana*. *BMC Plant Biol* **2007**, *7* (1), 35. <https://doi.org/10.1186/1471-2229-7-35>.
122. Wan, J.; Zhang, X.-C.; Neece, D.; Ramonell, K. M.; Clough, S.; Kim, S.; Stacey, M. G.; Stacey, G. A LysM Receptor-Like Kinase Plays a Critical Role in Chitin Signaling and Fungal Resistance in *Arabidopsis*. *The Plant Cell* **2008**, *20* (2), 471–481. <https://doi.org/10.1105/tpc.107.056754>.
123. Guan, X.; Zhao, H.; Xu, Y.; Wang, Y. Transient Expression of Glyoxal Oxidase from the Chinese Wild Grape *Vitis Pseudoreticulata* Can Suppress Powdery Mildew in a Susceptible Genotype. *Protoplasma* **2011**, *248* (2), 415–423. <https://doi.org/10.1007/s00709-010-0162-4>.
124. Risk, J. M.; Selter, L. L.; Krattinger, S. G.; Viccars, L. A.; Richardson, T. M.; Buesing, G.; Herren, G.; Lagudah, E. S.; Keller, B. Functional Variability of the Lr34 Durable Resistance Gene in Transgenic Wheat: Characterization of Lr34 Transgenic Wheat. *Plant Biotechnology Journal* **2012**, *10* (4), 477–487. <https://doi.org/10.1111/j.1467-7652.2012.00683.x>.
125. Shindo, T.; Misas-Villamil, J. C.; Hörger, A. C.; Song, J.; van der Hoorn, R. A. L. A Role in Immunity for *Arabidopsis* Cysteine Protease RD21, the Ortholog of the Tomato Immune Protease C14. *PLoS ONE* **2012**, *7* (1), e29317. <https://doi.org/10.1371/journal.pone.0029317>.
126. Xu, J.; Wei, X.; Yan, L.; Liu, D.; Ma, Y.; Guo, Y.; Peng, C.; Zhou, H.; Yang, C.; Lou, Z.; Shui, W. Identification and Functional Analysis of Phosphorylation Residues of the *Arabidopsis* *BOTRYTIS-INDUCED KINASE1*. *Protein Cell* **2013**, *4* (10), 771–781. <https://doi.org/10.1007/s13238-013-3053-6>.
127. Zhang, L.; Kars, I.; Essenstam, B.; Liebrand, T. W. H.; Wagemakers, L.; Elberse, J.; Tagkalaki, P.; Tjoitang, D.; van den Ackerveken, G.; van Kan, J. A. L. Fungal Endopolygalacturonases Are Recognized as Microbe-Associated Molecular Patterns by the *Arabidopsis* Receptor-Like Protein RESPONSIVENESS TO *BOTRYTIS* POLYGALACTURONASES1. *Plant Physiology* **2014**, *164* (1), 352–364. <https://doi.org/10.1104/pp.113.230698>.
128. Rinaldo, A.; Gilbert, B.; Boni, R.; Krattinger, S. G.; Singh, D.; Park, R. F.; Lagudah, E.; Ayliffe, M. The *Lr34* Adult Plant Rust Resistance Gene Provides Seedling Resistance in Durum Wheat without Senescence. *Plant Biotechnol J* **2017**, *15* (7), 894–905. <https://doi.org/10.1111/pbi.12684>.
129. Ellis, C.; Turner, J. G. The *Arabidopsis* Mutant *Cev1* Has Constitutively Active Jasmonate and Ethylene Signal Pathways and Enhanced Resistance to Pathogens. 10.
130. Miya, A.; Albert, P.; Shinya, T.; Desaki, Y.; Ichimura, K.; Shirasu, K.; Narusaka, Y.; Kawakami, N.; Kaku, H.; Shibuya, N. CERK1, a LysM Receptor Kinase, Is Essential for Chitin Elicitor Signaling in *Arabidopsis*. *Proceedings of the National Academy of Sciences* **2007**, *104* (49), 19613–19618. <https://doi.org/10.1073/pnas.0705147104>.
131. Vogel, J. P.; Raab, T. K.; Somerville, C. R.; Somerville, S. C. Mutations in *PMR5* Result in Powdery Mildew Resistance and Altered Cell Wall Composition: *PMR5* Is Required for Powdery Mildew Susceptibility. *The Plant Journal* **2004**, *40* (6), 968–978. <https://doi.org/10.1111/j.1365-313X.2004.02264.x>.

- 
132. Acevedo-Garcia, J.; Spencer, D.; Thieron, H.; Reinstädler, A.; Hammond-Kosack, K.; Phillips, A. L.; Panstruga, R. *Mlo* -Based Powdery Mildew Resistance in Hexaploid Bread Wheat Generated by a Non-Transgenic TILLING Approach. *Plant Biotechnol J* **2017**, *15* (3), 367–378. <https://doi.org/10.1111/pbi.12631>.
133. Bai, Y.; Pavan, S.; Zheng, Z.; Zappel, N. F.; Reinstädler, A.; Lotti, C.; De Giovanni, C.; Ricciardi, L.; Lindhout, P.; Visser, R.; Theres, K.; Panstruga, R. Naturally Occurring Broad-Spectrum Powdery Mildew Resistance in a Central American Tomato Accession Is Caused by Loss of *Mlo* Function. *MPMI* **2008**, *21* (1), 30–39. <https://doi.org/10.1094/MPMI-21-1-0030>.
134. Humphry, M.; Reinstädler, A.; Ivanov, S.; Bisseling, T.; Panstruga, R. Durable Broad-Spectrum Powdery Mildew Resistance in Pea Er1 Plants Is Conferred by Natural Loss-of-Function Mutations in PsMLO1: Molecular Cloning of the Pea Er1 Gene. *Molecular Plant Pathology* **2011**, *12* (9), 866–878. <https://doi.org/10.1111/j.1364-3703.2011.00718.x>.
135. Acevedo-Garcia, J.; Gruner, K.; Reinstädler, A.; Kemen, A.; Kemen, E.; Cao, L.; Takken, F. L. W.; Reitz, M. U.; Schäfer, P.; O’Connell, R. J.; Kusch, S.; Kuhn, H.; Panstruga, R. The Powdery Mildew-Resistant Arabidopsis Mlo2 Mlo6 Mlo12 Triple Mutant Displays Altered Infection Phenotypes with Diverse Types of Phytopathogens. *Sci Rep* **2017**, *7* (1), 9319. <https://doi.org/10.1038/s41598-017-07188-7>.
136. Kessler, S. A.; Shimosato-Asano, H.; Keinath, N. F.; Wuest, S. E.; Ingram, G.; Panstruga, R.; Grossniklaus, U. Conserved Molecular Components for Pollen Tube Reception and Fungal Invasion. *Science* **2010**, *330* (6006), 968–971. <https://doi.org/10.1126/science.1195211>.
137. Consonni, C.; Humphry, M. E.; Hartmann, H. A.; Livaja, M.; Durner, J.; Westphal, L.; Vogel, J.; Lipka, V.; Kemmerling, B.; Schulze-Lefert, P.; Somerville, S. C.; Panstruga, R. Conserved Requirement for a Plant Host Cell Protein in Powdery Mildew Pathogenesis. *Nat Genet* **2006**, *38* (6), 716–720. <https://doi.org/10.1038/ng1806>.
138. Panstruga, R. Serpentine Plant MLO Proteins as Entry Portals for Powdery Mildew Fungi. *Biochemical Society Transactions* **2005**, *33* (2), 389–392. <https://doi.org/10.1042/BST0330389>.
